# Supplementary material
Source: PubMed Central journal article supplement (PMC4362246)
Supplement: JCI75714sd.pdf [file JCI75714sd.pdf]

## SUPPLEMENTAL FIGURES

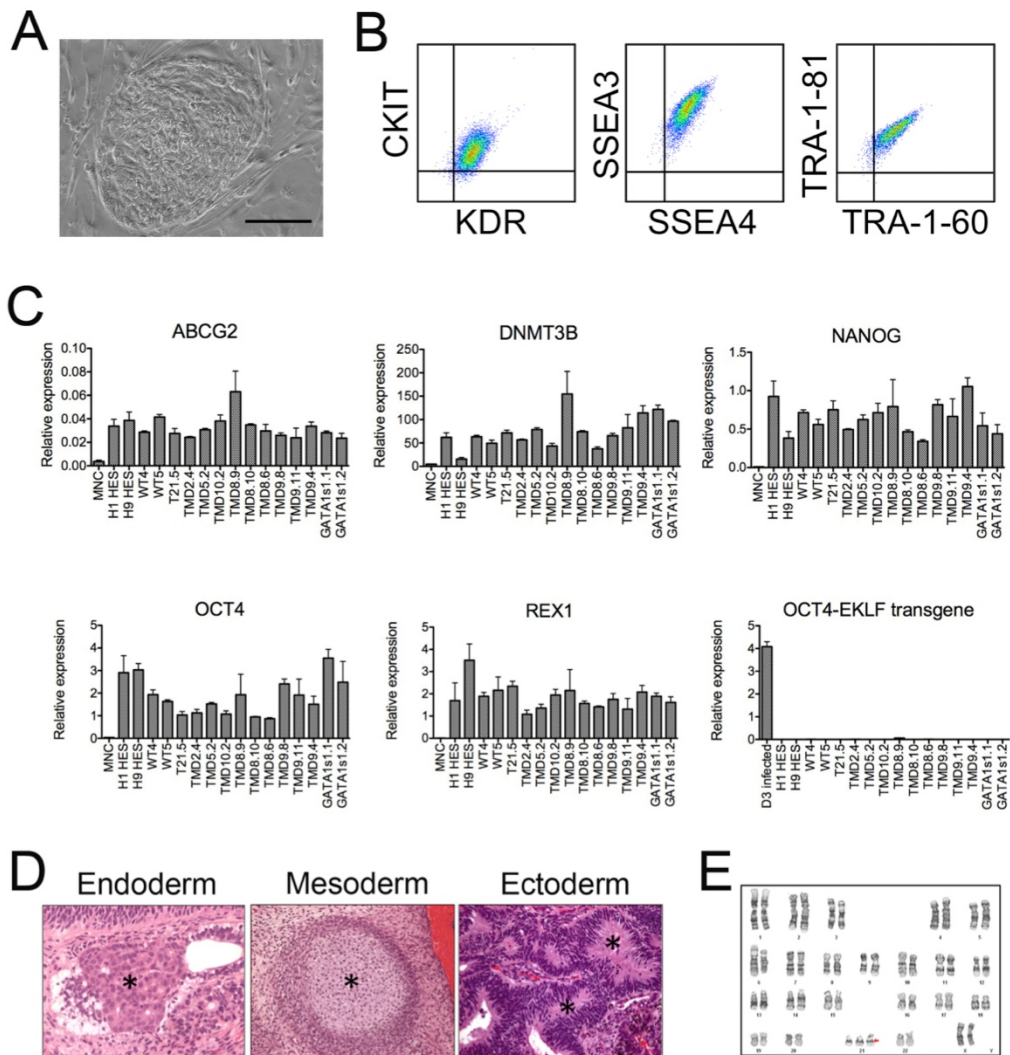

**Figure S1. Generation of induced pluripotent stem cells from patient-derived samples. A.** Photomicrograph demonstrating morphology of representative induced pluripotent stem cell (iPSC) colony. Scale bar, 200  $\mu$ m. **B.** Representative flow cytometric analysis of iPSCs for cell surface expression of typical human pluripotent stem cell markers CKIT, KDR (VEGFR), SSEA3, SSEA4, TRA-1-81, and TRA-1-60. **C.** Expression levels of endogenous factors quantified by semi-quantitative reverse transcriptase polymerase chain reaction (qRT-PCR) shown relative to cyclophilin levels. Bottom right panel shows expression levels of transgenic factors determined by qRT-PCR relative to cyclophilin levels. Results are shown as mean values plus or minus standard deviation ( $n = 3$  replicates). MNC = mononuclear cells, HES = human embryonic stem cell. TMD = transient myeloproliferative disease. **D.** Representative photomicrographs of teratomas generated from iPSCs injected into (NOD/SCID) beige mice contain all three germ layers denoted by \*. **E.** Representative karyotype analysis of iPSC clones showing trisomy 21.

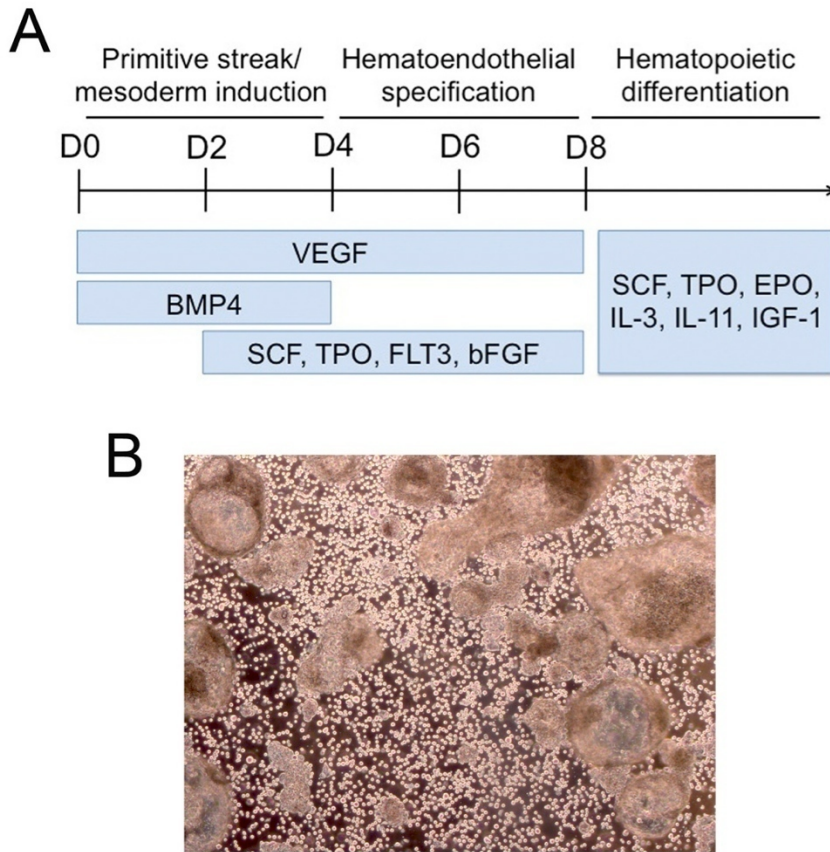

**Figure S2. Hematopoietic differentiation via embryoid body (EB) formation. A.** EBs were cultured in sequential cytokine combinations as indicated. VEGF, vascular endothelial growth factor; BMP4, bone morphogenic protein 4; SCF, stem cell factor; TPO, thrombopoietin; FLT3, FLT3-ligand; bFGF, fibroblast growth factor; EPO, erythropoietin; IL-3, interleukin-3; IL-11, interleukin-11; IGF-1, insulin growth factor-1. **B.** Photomicrograph of iPSC-derived EB culture with hematopoietic cells released into the medium. Original magnification, 4x.

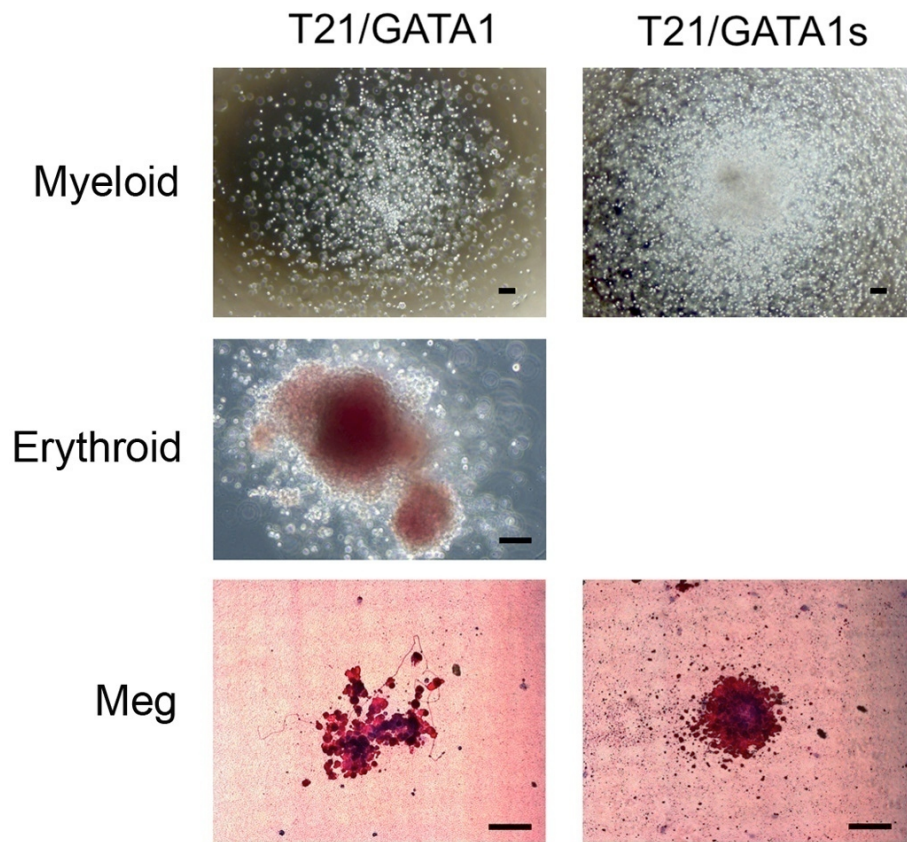

**Figure S3. Hematopoietic colonies generated from induced pluripotent stem cell (iPSC)-derived progenitors.** Representative myeloid, erythroid, and megakaryocyte (meg) colonies generated from T21/*wtGATA1* or T21/*GATA1s* iPSC-derived hematopoietic progenitors harvested on days 7-8 of embryoid body differentiation, and seeded into methylcellulose with EPO, SCF, IL3 and GMCSF, or Megacult collagen based assays with TPO, IL6 and IL3 for megakaryocyte colonies. Scale bars, 100  $\mu$ m.

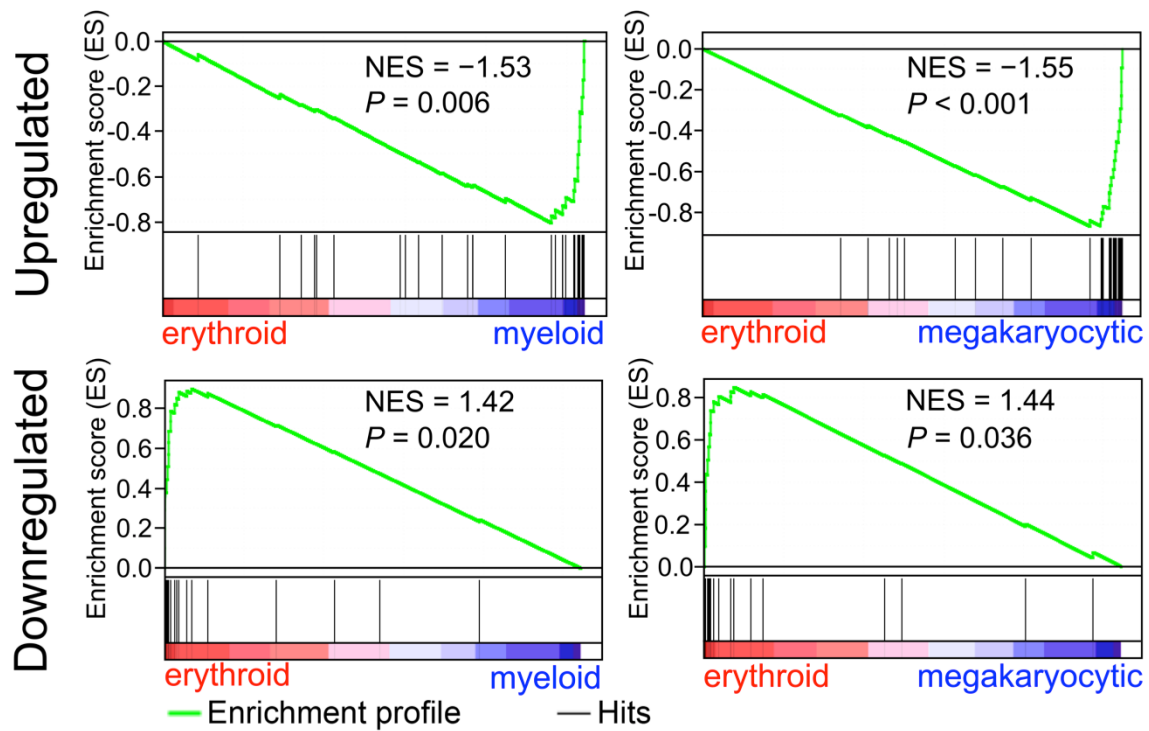

**Figure S4. Gene set enrichment analysis on 56 differentially expressed genes (BH-FDR < 0.1) that are  $\geq 2$ -fold up- or downregulated in T21/GATA1s as compared to T21/wtGATA1.** Top panels show enrichment of 34 upregulated genes in T21/GATA1s as compared to T21/wtGATA1 progenitors in a myeloid versus erythroid signature (top left), as well as in a megakaryocytic versus erythroid signature (top right). Bottom panels show enrichment of 22 downregulated genes in erythroid versus myeloid signature (bottom left), as well as in erythroid versus megakaryocytic signature (bottom right). NES, normalized enrichment score;  $P$  values shown are from modified Kolmogorov-Smirnov test as implemented in GSEA.

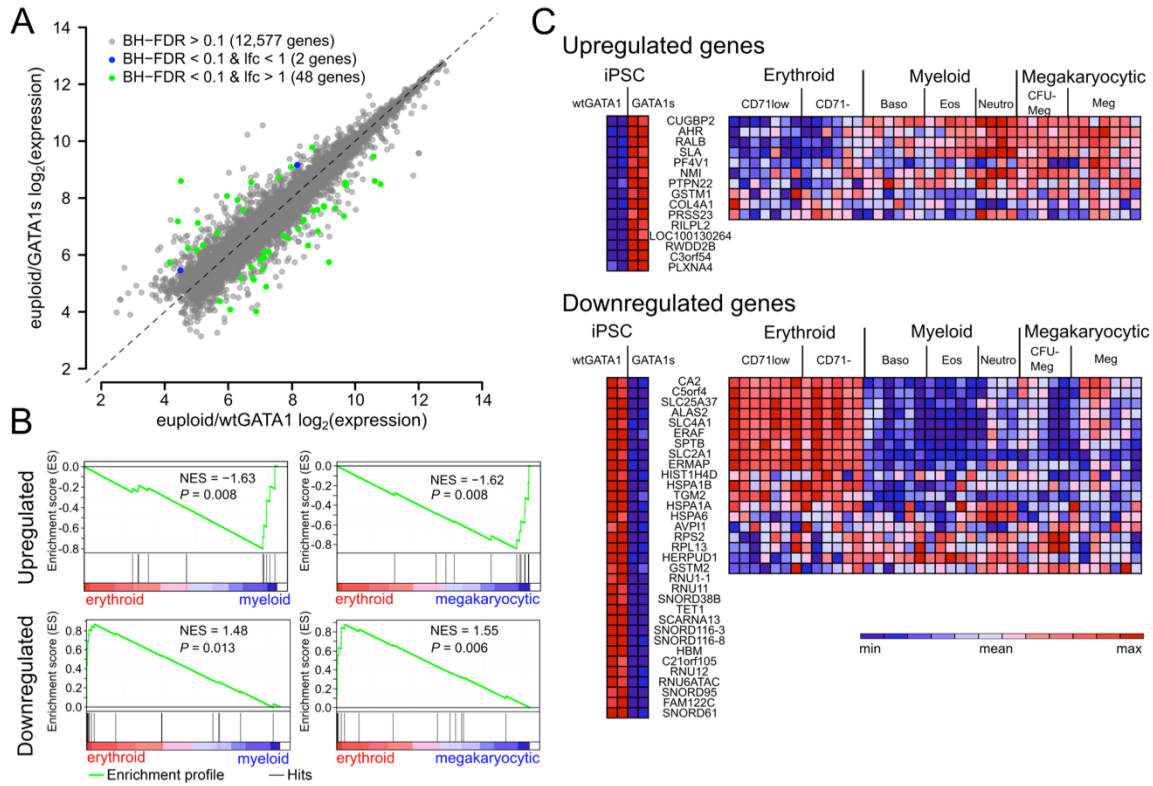

**Figure S5. GATA1s downregulates an erythroid program and upregulates a myelo-megakaryocytic program in a genomewide transcriptome analysis in euploid iPSC-derived progenitors.** **A.** Mean expression values of 12,627 expressed genes in euploid/*GATA1s* versus euploid/*wtGATA1* (2 replicates each) iPSC-derived CD43<sup>+</sup>41<sup>+</sup>235<sup>+</sup> progenitors. 50 genes were differentially expressed with a fold change of mean expression < 2 (2 genes, blue) or ≥ 2-fold (48 genes, green) between euploid/*GATA1s* and euploid/*wtGATA1*. **B.** GSEA showing enrichment of upregulated genes (top) in euploid/*GATA1s* as compared to euploid/*wtGATA1* progenitors in a myeloid versus erythroid signature, as well as in megakaryocytic versus erythroid signature, and enrichment of downregulated genes (bottom) in erythroid versus myeloid signature, as well as in erythroid versus megakaryocytic signature. NES, normalized enrichment score; *P* values shown are from modified Kolmogorov-Smirnov test as implemented in GSEA. **C.** Heat maps showing expression levels of upregulated (top) and downregulated (bottom) genes in euploid/*GATA1s* versus euploid/*wtGATA1* progenitors (top left and bottom left), as well as lineage-committed cells (top and bottom right) based on expressions levels in erythroid (7 replicates of CD34<sup>+</sup>71<sup>low</sup>GlyA<sup>+</sup>, 6 replicates of CD34<sup>+</sup>71<sup>+</sup>GlyA<sup>+</sup> cells), myeloid (6 replicates of basophils, 5 replicates of eosinophils, 4 replicates of neutrophils), and megakaryocytic cells (5 replicates of CFU-megakaryocytes, CD34<sup>+</sup>41<sup>+</sup>61<sup>+</sup>45<sup>-</sup>, 7 replicates of mature megakaryocytes, CD34<sup>+</sup>41<sup>+</sup>61<sup>+</sup>45<sup>-</sup>) from Novershtern *et al* (1). Color scheme is row normalized from blue to red corresponding to minimum to maximum expression values in a given row, respectively. Genes with no expression information in lineage-committed cells were not represented on microarrays from Novershtern *et al* (1).

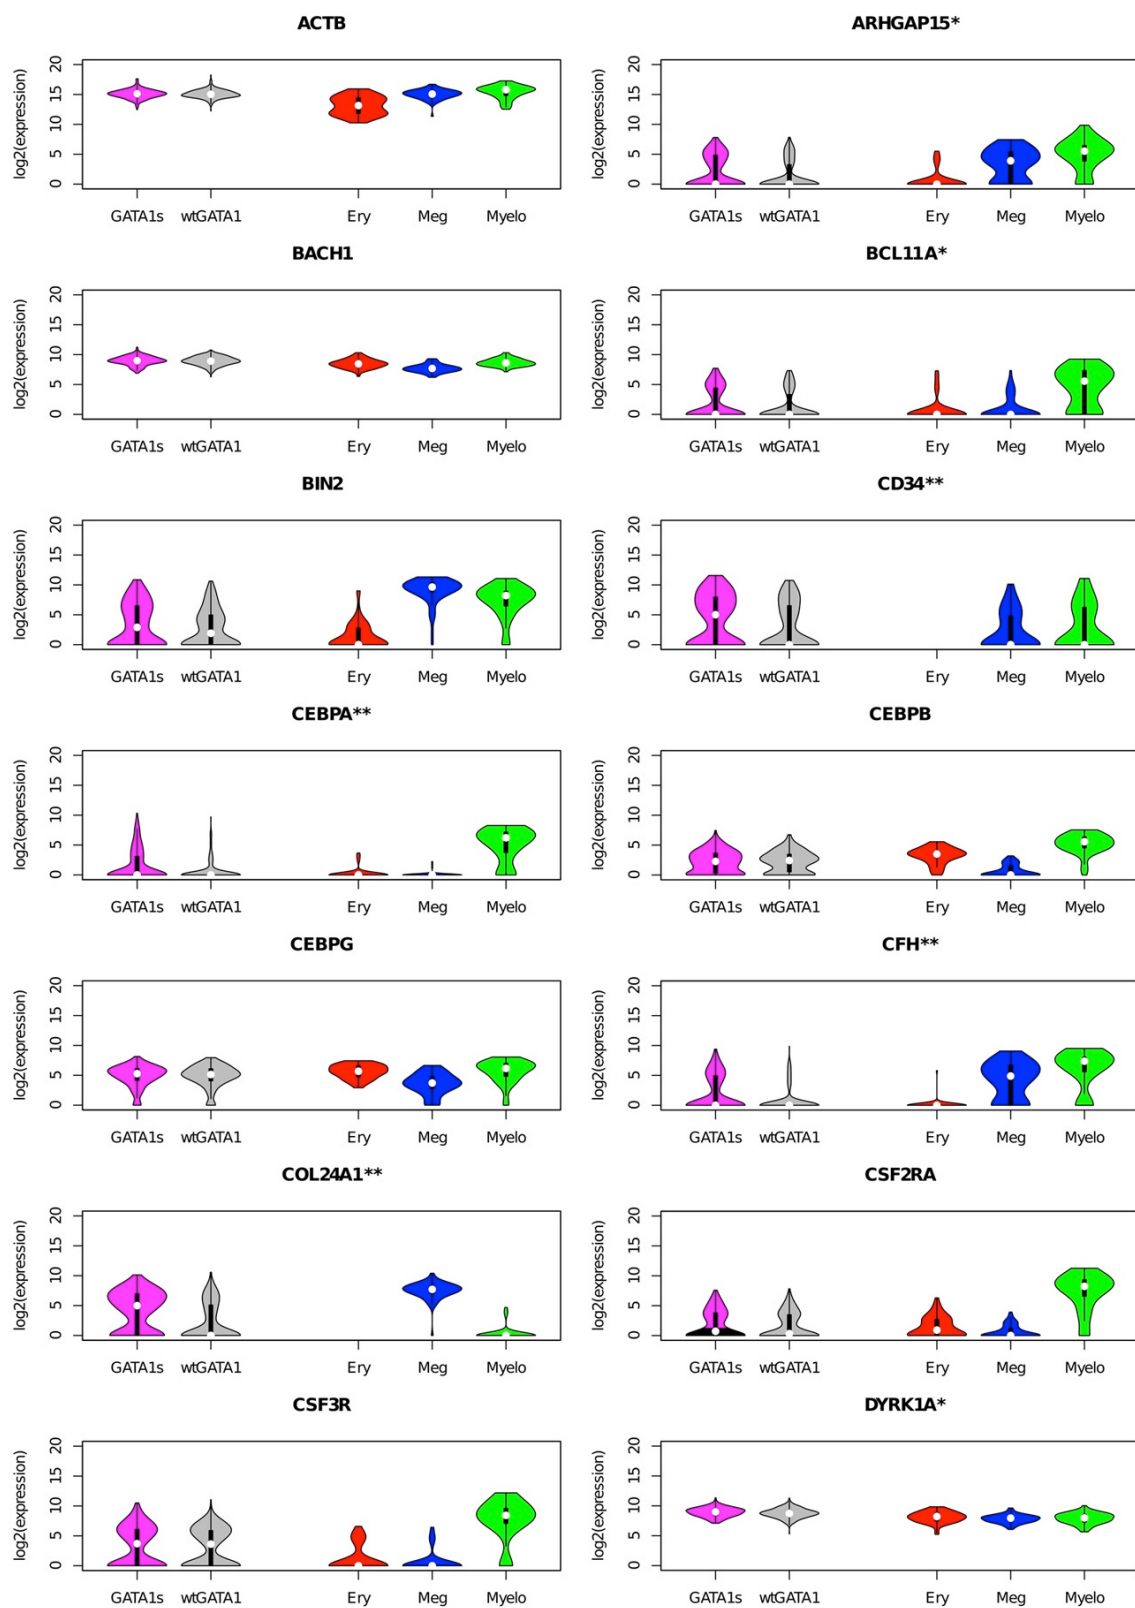

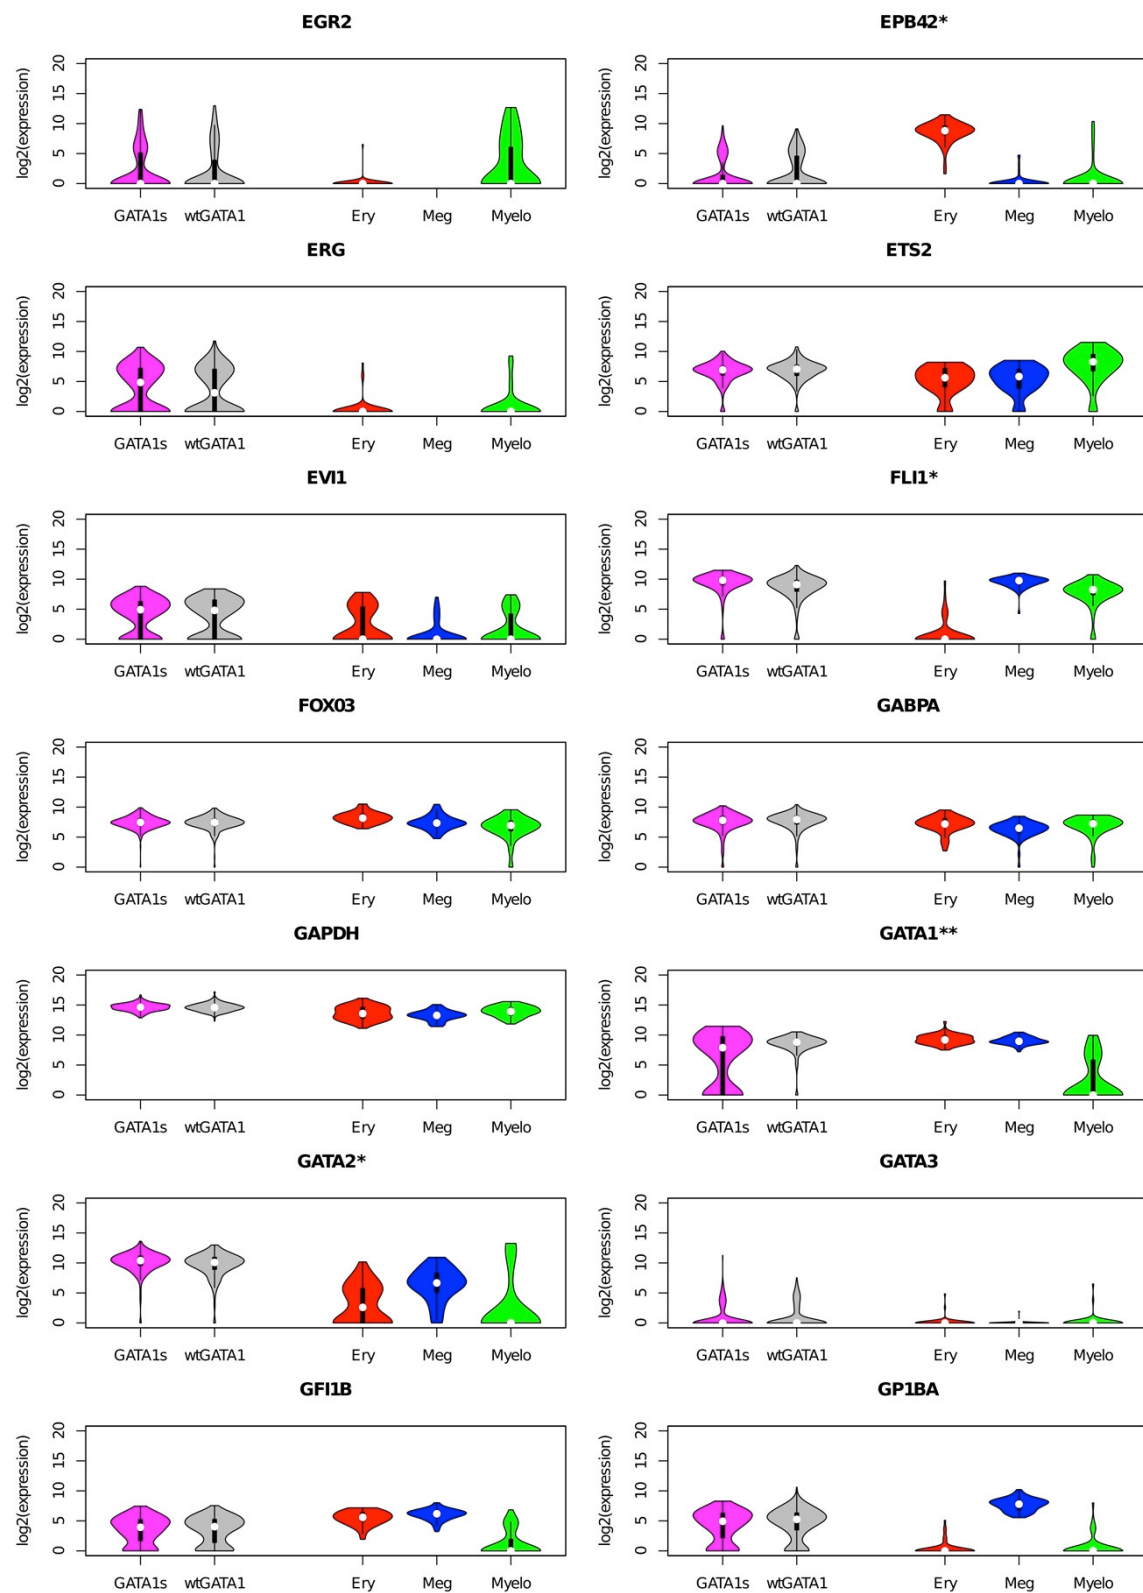

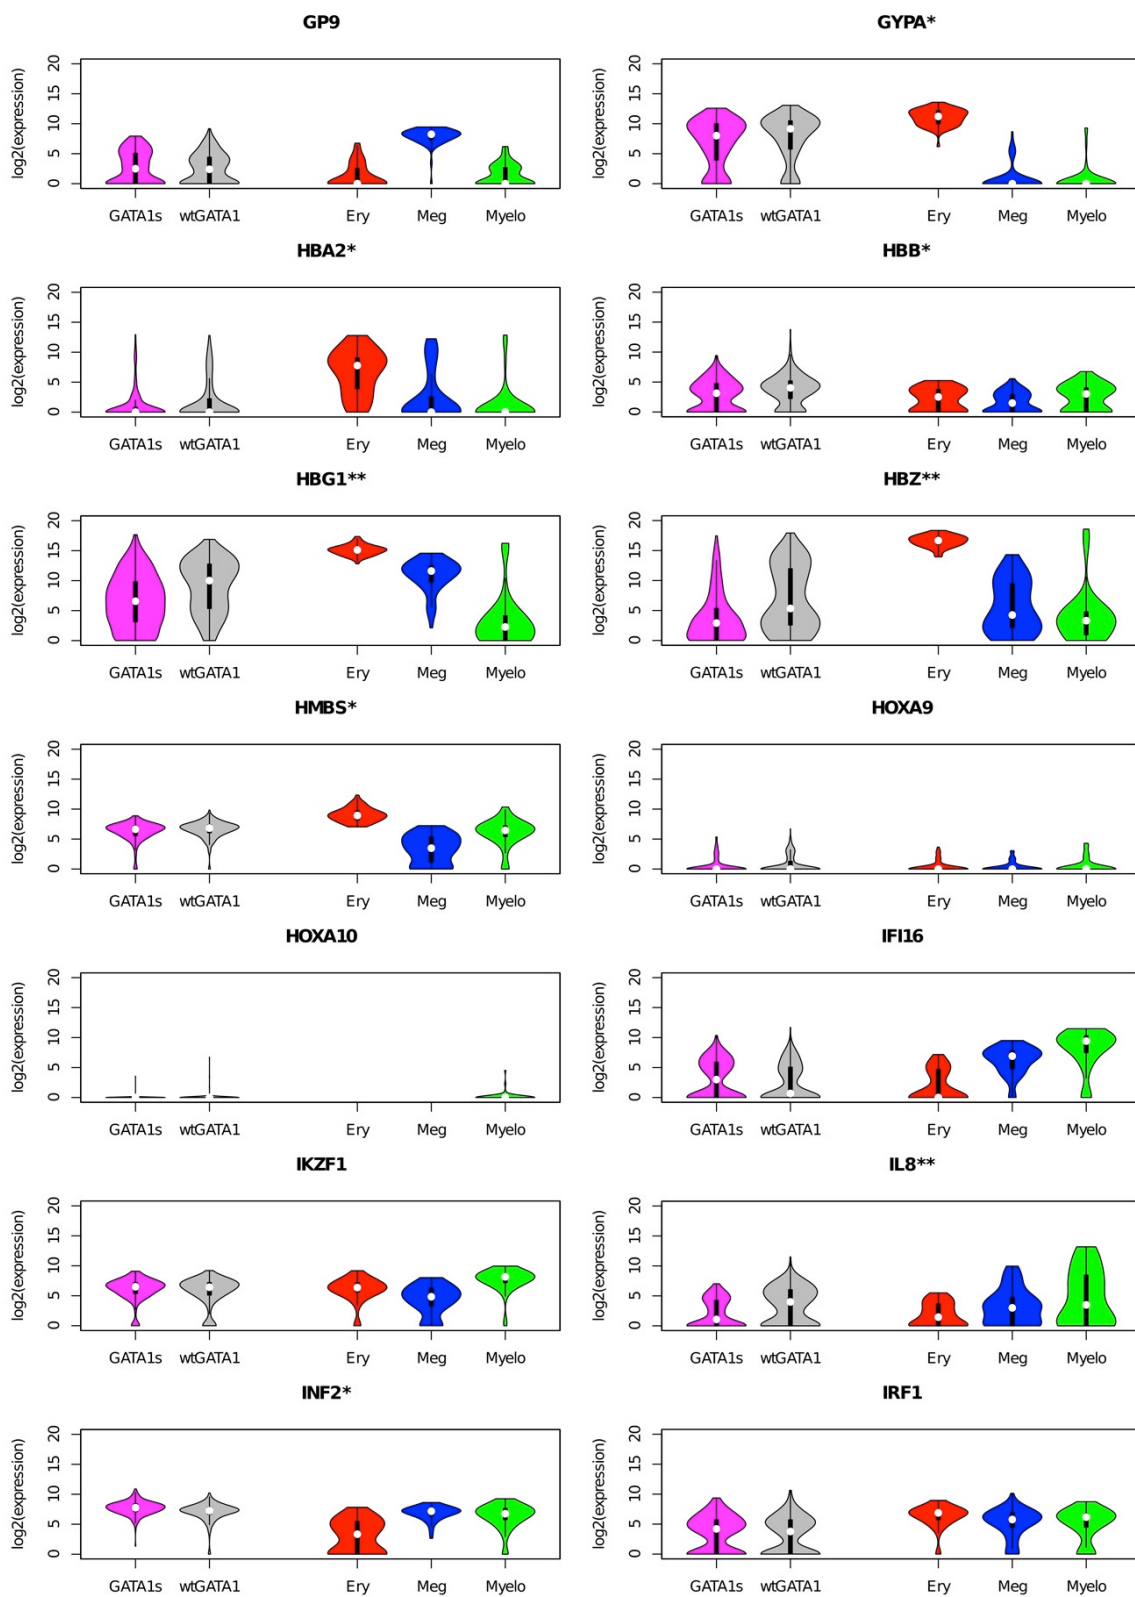

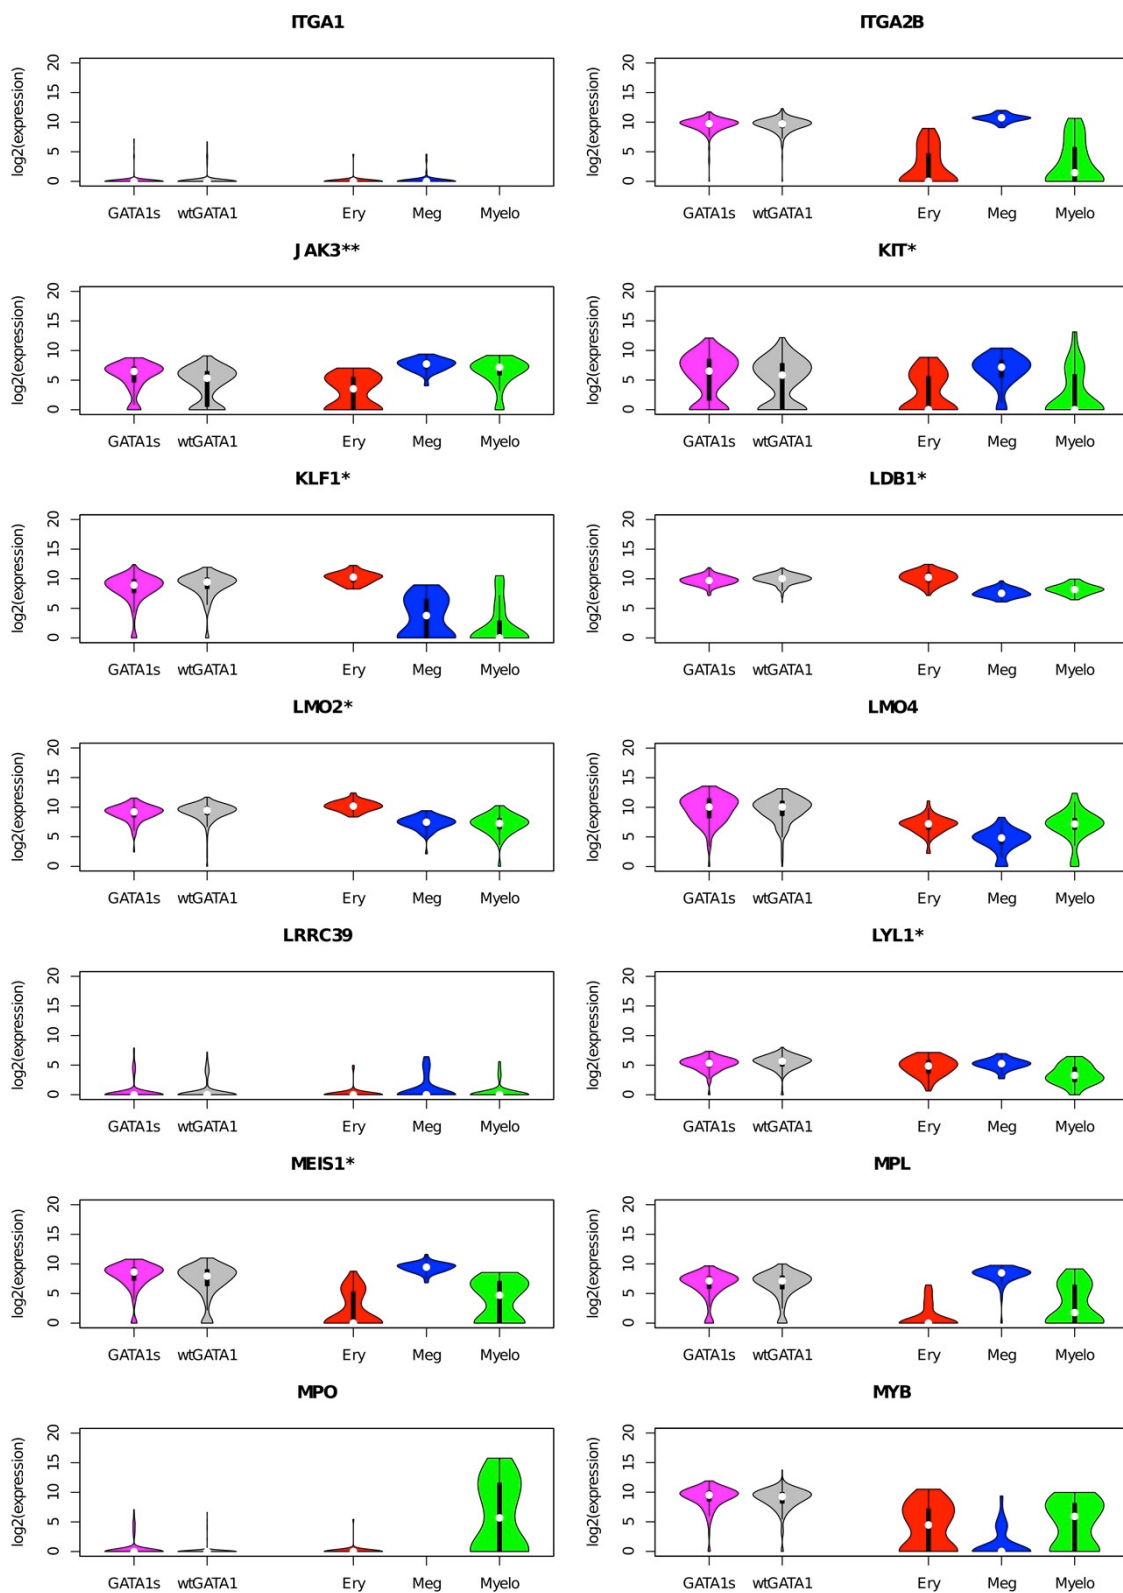

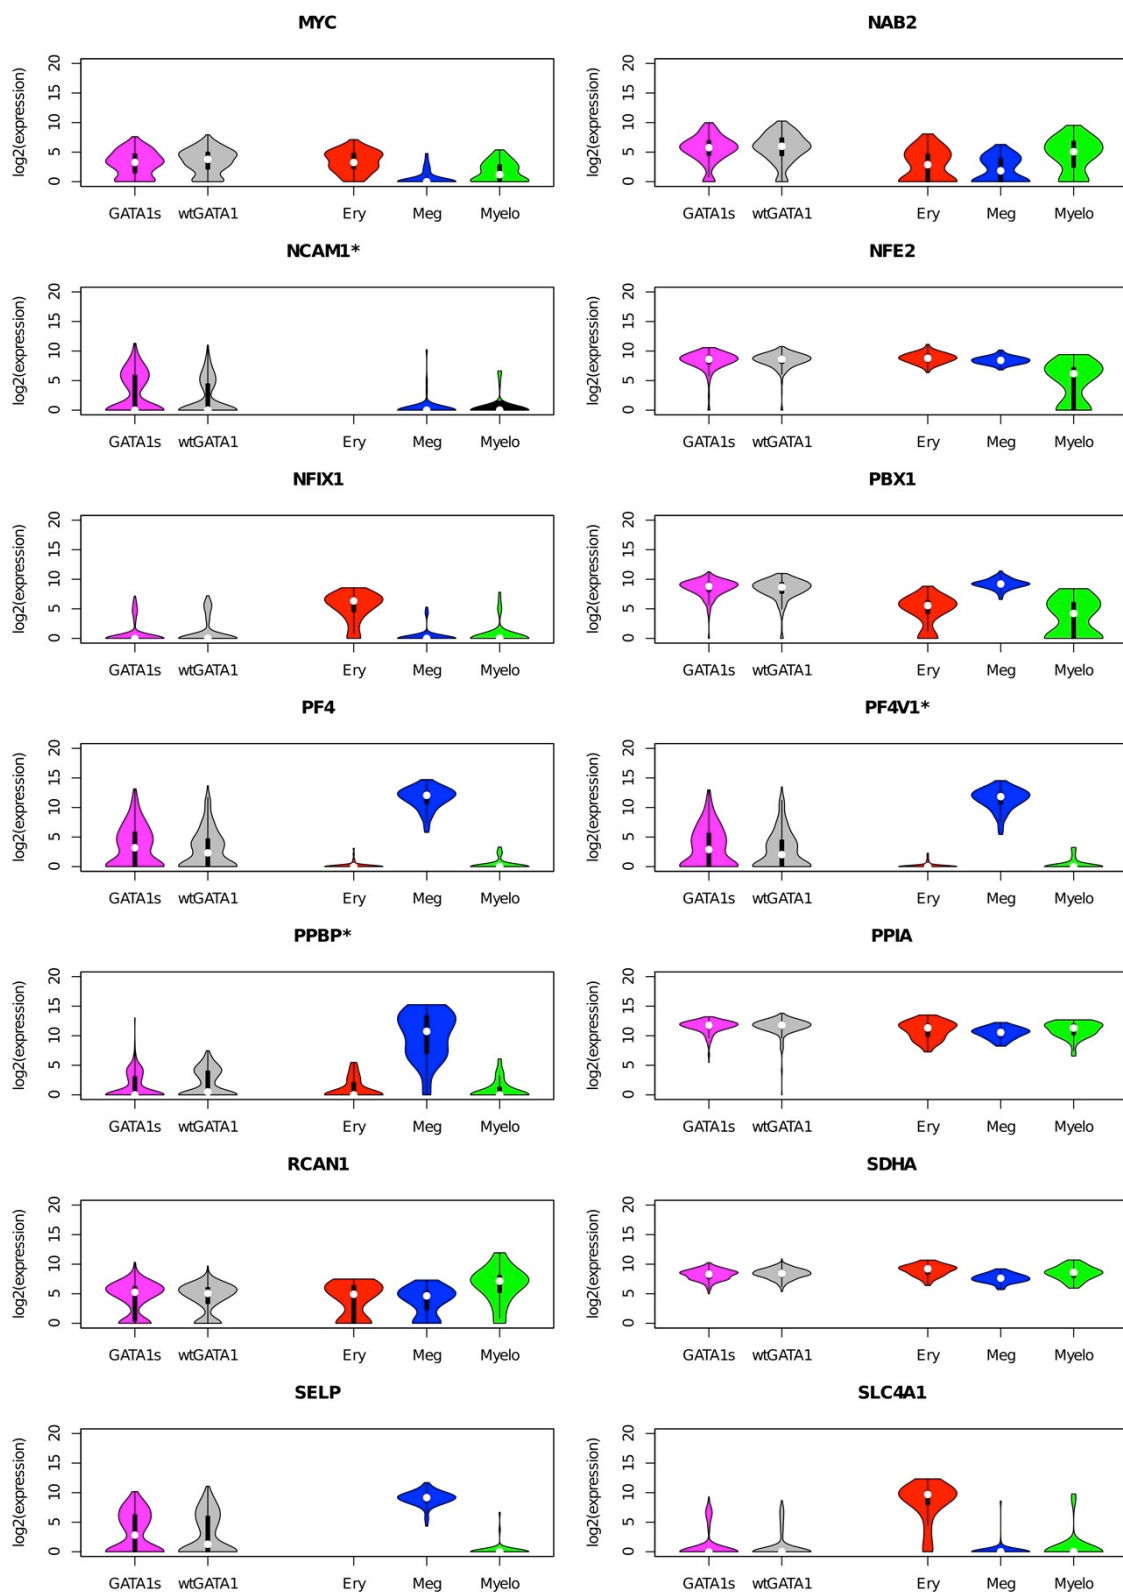

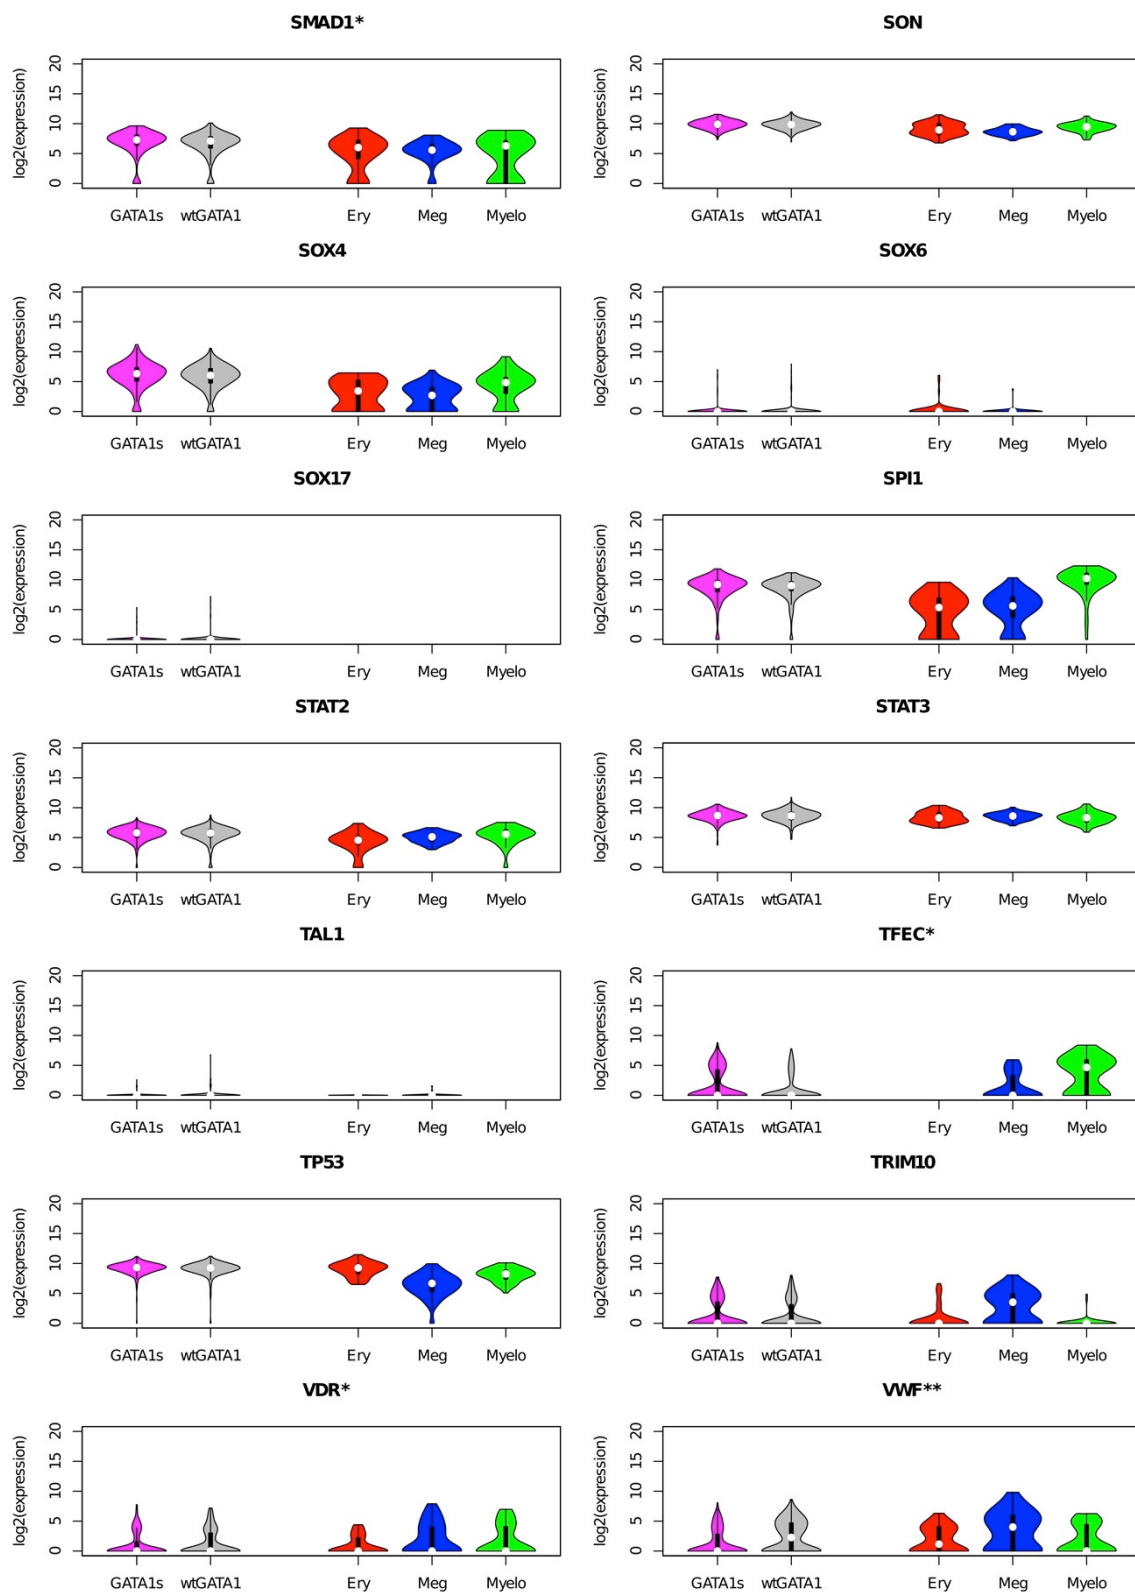

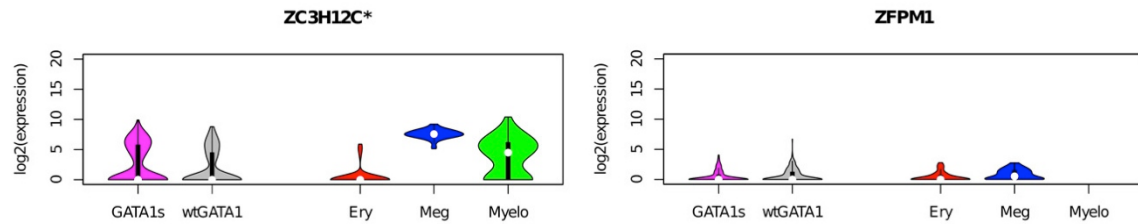

**Figure S6. Violin plots showing distributions of single cell expression levels for each of the analyzed genes in *GATA1s* and *wtGATA1* progenitors, and lineage-committed erythroid, megakaryocytic, and myeloid cells.** Numbers of cells whose expression values for a given gene were included in each violin: 274 *GATA1s*- and 311 *wtGATA1*-expressing iPSC-derived progenitors, and 57 erythroid, 61 megakaryocytic, and 52 myeloid iPSC-derived lineage-committed cells. Single asterisk (\*) next to a gene symbol marks genes that are differentially expressed between *GATA1s* and *wtGATA1* progenitors (FDR < 0.05; Mann-Whitney *U* test followed by BH-FDR correction). Double asterisk (\*\*) marks differentially expressed genes (FDR < 0.05) that are  $\geq 2$ -fold up- or downregulated in *GATA1s* as compared to *wtGATA1* progenitors. lfc – log<sub>2</sub> of fold change of mean gene expression between *GATA1s* and *wtGATA1* progenitors. Violin plots are organized in an alphabetical order. Violin plots for *F10* and *WNT10A* are not shown, because these genes displayed no detectable expression across all cell types analyzed. Violin plots for *CSF1R*, *GFI1*, *RUNX1*, *HBE1*, *ALAS2*, and *EPOR* are in Figure 5D.

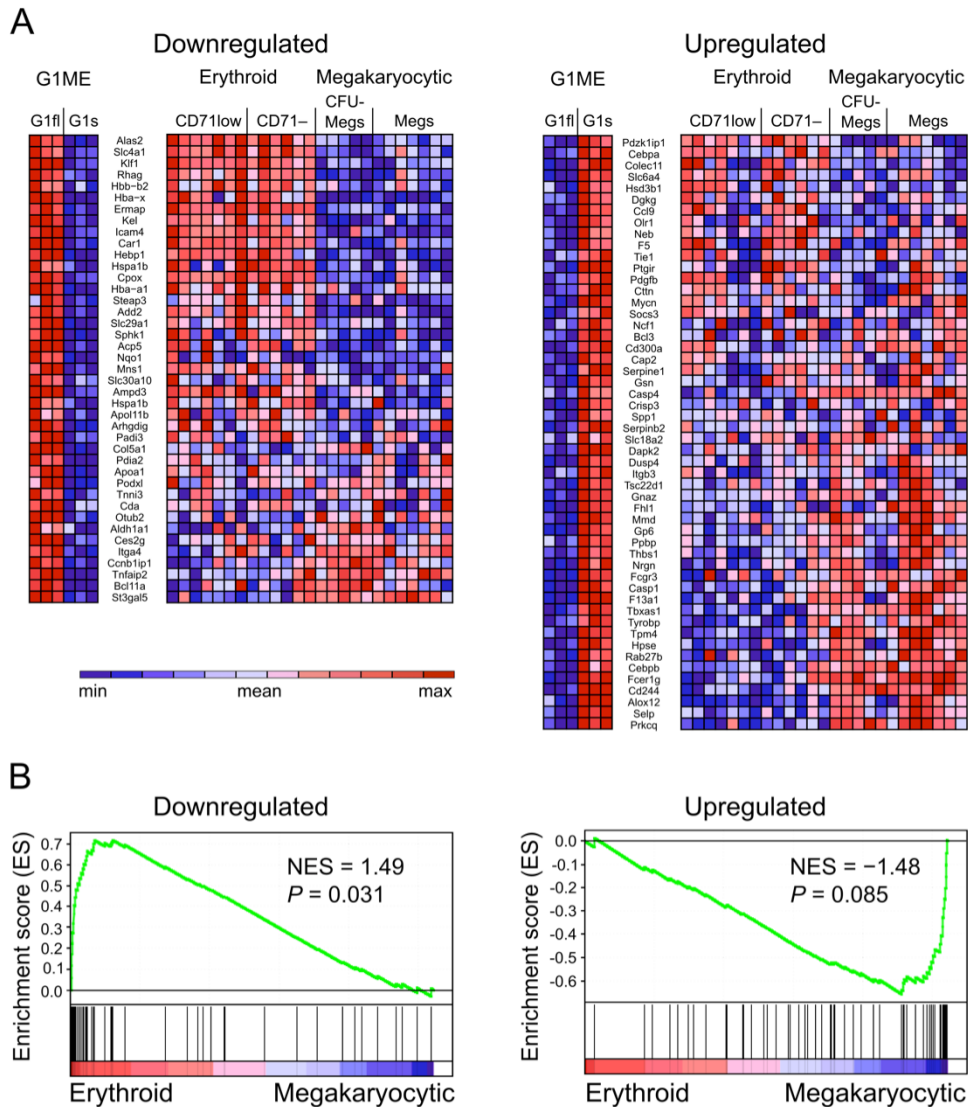

**Figure S7. GATA1s downregulates an erythroid transcriptional program and upregulates a megakaryocytic program in *Gata1*<sup>-/-</sup> murine megakaryocyte-erythroid progenitors at 42 hours post-transduction. A.** Heat maps showing expression levels of genes downregulated (first from the left) and upregulated (third from the left) in G1ME/GATA1s vs. G1ME/GATA1fl (3 replicates each; FDR < 0.1, > 2-fold change in expression). Second and fourth heat maps from the left show expression levels of downregulated and upregulated genes, respectively, in human erythroid (7 replicates of CD34<sup>+</sup>71<sup>low</sup>GlyA<sup>+</sup>, 6 replicates of CD34<sup>+</sup>71<sup>low</sup>GlyA<sup>+</sup> cells) and megakaryocytic cells (5 replicates of CFU-megakaryocytes, CD34<sup>+</sup>41<sup>+</sup>61<sup>+</sup>45<sup>-</sup>, 7 replicates of mature megakaryocytes, CD34<sup>+</sup>41<sup>+</sup>61<sup>+</sup>45<sup>-</sup>) from Novershtern *et al* (1). Color scheme is row normalized from blue to red corresponding to minimum to maximum expression values in a given row, respectively. **B.** GSEA showing enrichment of genes that are downregulated by GATA1s (left) for erythroid as compared to megakaryocytic genes, and enrichment of genes that are upregulated by GATA1s (right) for megakaryocytic as compared to erythroid genes.

NES, normalized enrichment score;  $P$  values shown are from modified Kolmogorov-Smirnov test as implemented in GSEA. Since human erythroid and megakaryocytic expression data sets were used as gene signatures in panels A and B, only those down- and upregulated genes that have orthologs in the human genome were listed in heat maps and included in the GSEA.

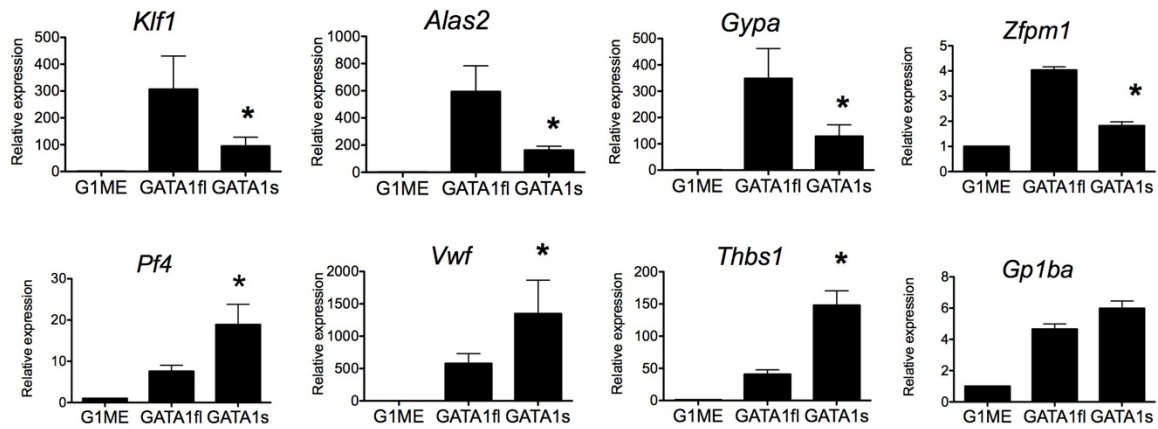

**Figure S8. Expression of selected gene targets in G1ME cells transduced with GATA1fl or GATA1s.** Average expression of selected erythroid (top) and megakaryocytic (bottom) GATA1 target genes 42 hours post-transduction +/- SD (n = 4 independent experiments). \* $P < 0.05$  (2-tailed Student's  $t$  test).

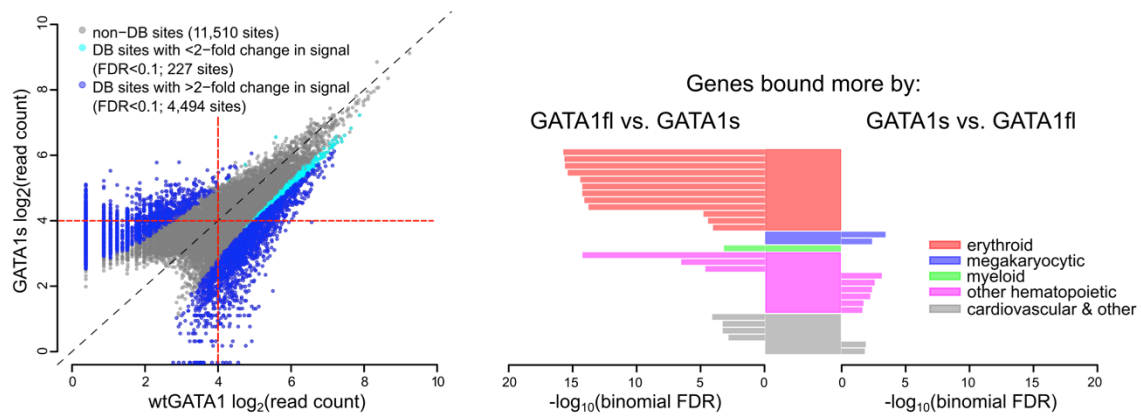

**Figure S9. Sites bound more by GATA1s display lower binding signal and less significant functional enrichment as compared to sites bound more by GATA1f.** **Left**, as described in Figure 7D. Red dashed lines represent a threshold of binding signal, applied for the analysis on the right, separating sites with lower signal from sites with higher signal. **Right**, Functional enrichment analysis using GREAT performed on differentially bound sites with  $> 2$ -fold change in binding signal and normalized read count of  $> 4$ . Plotted are significance values for top 10 “mouse phenotype” and “GO biological process” enrichment terms (30 terms total; there were no significant “GO biological process” terms for genes bound more by GATA1s vs. GATA1f at sites with higher binding signal), classified as erythroid, megakaryocytic, myeloid, other hematopoietic, or cardiovascular and other.

## SUPPLEMENTAL TABLES

**Table S1. Induced pluripotent stem cell lines used in this study.** WT, wild type; T21, trisomy 21; TMD, transient myeloproliferative disorder; PB, peripheral blood; MNC, mononuclear cells; Retro, pMXs-based retroviruses, Lenti, hSTEMMCA-loxP lentivirus; OSKM, *OCT4*, *SOX2*, *KLF4*, *MYC*. <sup>#</sup>Lines characterized in (2). \*Line purchased from George Daley lab, \*\*NCBI reference sequence NM\_002049, nucleotide 1 = first nucleotide of exon 1. Rows in different shades of gray represent isogenic lines derived from the same patient with and without *GATA1* mutations.

| Name               | Cell of Origin      | Reprogramming Vector | Karyotype   | <i>GATA1</i> ** |
|--------------------|---------------------|----------------------|-------------|-----------------|
| WT1*               | Neonatal fibroblast | Retro: OSKM          | 46, XY      | WT              |
| WT2 <sup>#</sup>   | Fetal stromal cell  | Retro: OSKM          | 46, XY      | WT              |
| WT3 <sup>#</sup>   | Fetal MNC           | Lenti: OSKM          | 46, XY      | WT              |
| WT4                | Fetal MNC           | Lenti: OSKM          | 46, XY      | WT              |
| WT5                | Fetal MNC           | Lenti: OSKM          | 46, XX      | WT              |
| T21.1 <sup>#</sup> | Neonatal fibroblast | Retro: OSKM          | 47, XY, +21 | WT              |
| T21.2 <sup>#</sup> | Fetal stromal cell  | Retro: OSKM          | 47, XY, +21 | WT              |
| T21.3 <sup>#</sup> | Fetal stromal cell  | Retro: OSKM          | 47, XY, +21 | WT              |
| T21.4 <sup>#</sup> | Fetal MNC           | Lenti: OSKM          | 47, XY, +21 | WT              |
| T21.5              | Fetal MNC           | Lenti: OSKM          | 47, XY, +21 | WT              |
| TMD2.4             | PB MNC              | Lenti: OSKM          | 47, XY, +21 | g.4605del       |
| TMD5.2             | PB MNC              | Lenti: OSKM          | 47, XY, +21 | g.4757G>A       |
| TMD10.2            | PB MNC              | Lenti: OSKM          | 47, XX, +21 | g.4703dup       |
| TMD8.9             | PB MNC              | Lenti: OSKM          | 47, XX, +21 | g.4652G>T       |
| TMD8.10            | PB MNC              | Lenti: OSKM          | 47, XX, +21 | WT              |
| TMD8.6             | PB MNC              | Lenti: OSKM          | 47, XX, +21 | WT              |
| TMD9.8             | PB MNC              | Lenti: OSKM          | 47, XX, +21 | g.4500del_ins   |
| TMD9.11            | PB MNC              | Lenti: OSKM          | 47, XX, +21 | g.4500del_ins   |
| TMD9.4             | PB MNC              | Lenti: OSKM          | 47, XX, +21 | WT              |
| GATA1s1.1          | Adult fibroblasts   | Lenti: OSKM          | 46, XY      | g.4755G>C       |
| GATA1s1.2          | Adult fibroblasts   | Lenti: OSKM          | 46, XY      | g.4755G>C       |

**Table S2.** Genes differentially expressed between T21/GATA1s and T21/wtGATA1 iPSC-derived progenitors (BH-FDR < 0.1; lfc ≥ 1) identified using moderated *t* test (“limma” package in R). Probability, probability that a gene is differentially expressed (from “limma” package in R); lfc, log<sub>2</sub> of fold change (negative numbers correspond to downregulation in GATA1s- as compared to wtGATA1-expressing cells, whereas positive numbers correspond to upregulation in GATA1s- as compared to wtGATA1-expressing cells); GATA1 targets, genes that are bound by GATA1 in human PBDE and/or PBDEFetal cells at one or more sites within a 10kb gene neighborhood, i.e. 10kb upstream of TSS + gene body + 10kb downstream of TES (“1” – GATA1 target, “0” – not a GATA1 target). Genes are ordered from largest to smallest absolute value of lfc.

| Downregulated in T21/GATA1s vs. T21/wtGATA1 |          |          |             |       |               |
|---------------------------------------------|----------|----------|-------------|-------|---------------|
| Gene symbol                                 | P value  | BH-FDR   | Probability | lfc   | GATA1 targets |
| HBZ                                         | 2.90E-06 | 3.94E-03 | 0.99        | -3.96 | 1             |
| AHSP                                        | 7.94E-04 | 5.79E-02 | 0.45        | -2.42 | 1             |
| RELN                                        | 7.44E-06 | 5.78E-03 | 0.98        | -2.04 | 1             |
| ALAS2                                       | 4.74E-06 | 4.80E-03 | 0.99        | -2.01 | 1             |
| SPTA1                                       | 3.02E-04 | 3.53E-02 | 0.67        | -2.01 | 1             |
| SLC30A10                                    | 3.79E-07 | 1.94E-03 | 1.00        | -1.81 | 1             |
| APOC1                                       | 2.72E-06 | 3.94E-03 | 0.99        | -1.61 | 1             |
| HBA1                                        | 1.15E-03 | 7.11E-02 | 0.37        | -1.60 | 1             |
| HBA2                                        | 1.15E-03 | 7.11E-02 | 0.37        | -1.60 | 1             |
| MYH10                                       | 2.39E-05 | 1.28E-02 | 0.95        | -1.57 | 1             |
| HBG1                                        | 5.27E-04 | 4.69E-02 | 0.55        | -1.48 | 1             |
| SLC25A21                                    | 1.72E-03 | 8.68E-02 | 0.28        | -1.44 | 1             |
| SLC25A37                                    | 5.34E-07 | 1.94E-03 | 1.00        | -1.34 | 1             |
| OCIAD2                                      | 8.37E-07 | 2.28E-03 | 1.00        | -1.18 | 0             |
| NEDD4L                                      | 3.36E-05 | 1.30E-02 | 0.94        | -1.14 | 1             |
| LY6G6D                                      | 1.17E-04 | 2.16E-02 | 0.83        | -1.13 | 1             |
| HBE1                                        | 2.38E-04 | 3.05E-02 | 0.72        | -1.09 | 1             |
| BLVRB                                       | 3.20E-05 | 1.29E-02 | 0.94        | -1.08 | 1             |
| GSTA1                                       | 2.39E-03 | 9.68E-02 | 0.22        | -1.05 | 0             |
| ANKRD26                                     | 1.17E-04 | 2.16E-02 | 0.83        | -1.03 | 0             |
| KEL                                         | 6.19E-05 | 1.72E-02 | 0.90        | -1.03 | 1             |
| JHDM1D                                      | 1.40E-04 | 2.34E-02 | 0.81        | -1.01 | 1             |
| Upregulated in T21/GATA1s vs. T21/wtGATA1   |          |          |             |       |               |
| Gene symbol                                 | P value  | BH-FDR   | Probability | lfc   | GATA1 targets |
| IFI16                                       | 4.43E-04 | 4.30E-02 | 0.59        | 2.27  | 1             |

|          |          |          |      |      |   |
|----------|----------|----------|------|------|---|
| PF4V1    | 1.13E-03 | 7.11E-02 | 0.37 | 2.03 | 0 |
| CFH      | 1.30E-03 | 7.57E-02 | 0.34 | 2.01 | 1 |
| PARP9    | 1.79E-03 | 8.81E-02 | 0.27 | 2.01 | 0 |
| IFIT1    | 1.92E-03 | 8.97E-02 | 0.26 | 1.94 | 1 |
| ARHGAP15 | 2.02E-04 | 2.78E-02 | 0.75 | 1.87 | 1 |
| TFEC     | 6.48E-05 | 1.72E-02 | 0.89 | 1.79 | 0 |
| ZC3H12C  | 4.75E-05 | 1.61E-02 | 0.92 | 1.72 | 0 |
| NCAM1    | 2.82E-06 | 3.94E-03 | 0.99 | 1.68 | 0 |
| BIN2     | 1.46E-04 | 2.41E-02 | 0.80 | 1.63 | 1 |
| COL24A1  | 6.67E-04 | 5.32E-02 | 0.49 | 1.62 | 0 |
| IL8      | 1.36E-06 | 2.96E-03 | 1.00 | 1.49 | 1 |
| P2RY13   | 2.18E-04 | 2.96E-02 | 0.73 | 1.41 | 0 |
| CD180    | 6.03E-06 | 5.46E-03 | 0.99 | 1.39 | 1 |
| PDE3A    | 1.05E-03 | 6.93E-02 | 0.39 | 1.38 | 1 |
| P2RY14   | 1.62E-03 | 8.47E-02 | 0.29 | 1.38 | 1 |
| RGS18    | 7.96E-05 | 1.84E-02 | 0.87 | 1.35 | 0 |
| BIRC3    | 2.44E-04 | 3.05E-02 | 0.71 | 1.33 | 1 |
| GPR171   | 2.06E-03 | 9.12E-02 | 0.25 | 1.32 | 1 |
| S100B    | 6.30E-04 | 5.16E-02 | 0.51 | 1.29 | 0 |
| ATP8B4   | 1.54E-04 | 2.49E-02 | 0.79 | 1.26 | 1 |
| LPAR4    | 6.41E-04 | 5.16E-02 | 0.50 | 1.26 | 0 |
| MIR221   | 1.26E-04 | 2.25E-02 | 0.82 | 1.25 | 0 |
| ABCB1    | 1.83E-04 | 2.59E-02 | 0.76 | 1.24 | 1 |
| CD44     | 6.04E-05 | 1.72E-02 | 0.90 | 1.22 | 1 |
| CXCL2    | 8.78E-04 | 6.08E-02 | 0.43 | 1.22 | 1 |
| CXCL6    | 8.57E-05 | 1.94E-02 | 0.87 | 1.19 | 0 |
| P2RY12   | 1.34E-03 | 7.69E-02 | 0.33 | 1.13 | 1 |
| FCGR2A   | 5.04E-05 | 1.66E-02 | 0.91 | 1.13 | 1 |
| RGS1     | 7.85E-05 | 1.84E-02 | 0.88 | 1.11 | 0 |
| MMRN1    | 7.28E-05 | 1.76E-02 | 0.88 | 1.09 | 1 |
| FYB      | 7.37E-04 | 5.60E-02 | 0.47 | 1.04 | 1 |
| FUT8     | 6.27E-04 | 5.16E-02 | 0.51 | 1.03 | 1 |
| EGF      | 1.35E-03 | 7.70E-02 | 0.33 | 1.01 | 0 |

**Table S3.** List of 94 selected genes whose expression was measured at a single cell level in iPSC-derived progenitors expressing wtGATA1 or GATA1s, as well as in iPSC-derived lineage-committed erythroid, megakaryocytic, or myeloid cells. Genes are listed in an alphabetical order. An asterisk next to a gene symbol marks housekeeping genes.

| Gene symbol | Description                                                                        |
|-------------|------------------------------------------------------------------------------------|
| ACTB *      | actin, beta                                                                        |
| ALAS2       | aminolevulinate, delta-, synthase 2                                                |
| ARHGAP15    | Rho GTPase activating protein 15                                                   |
| BACH1       | BTB and CNC homology 1, basic leucine zipper transcription factor 1                |
| BCL11A      | B-cell CLL/lymphoma 11A (zinc finger protein)                                      |
| BIN2        | bridging integrator 2                                                              |
| CD34        | CD34 molecule                                                                      |
| CEBPA       | CCAAT/enhancer binding protein (C/EBP), alpha                                      |
| CEBPB       | CCAAT/enhancer binding protein (C/EBP), beta                                       |
| CEBPG       | CCAAT/enhancer binding protein (C/EBP), gamma                                      |
| CFH         | complement factor H                                                                |
| COL24A1     | collagen, type XXIV, alpha 1                                                       |
| CSF1R       | colony stimulating factor 1 receptor                                               |
| CSF2RA      | colony stimulating factor 2 receptor, alpha, low-affinity (granulocyte-macrophage) |
| CSF3R       | colony stimulating factor 3 receptor (granulocyte)                                 |
| DYRK1A      | dual-specificity tyrosine-(Y)-phosphorylation regulated kinase 1A                  |
| EGR2        | early growth response 2                                                            |
| EPB42       | erythrocyte membrane protein band 4.2                                              |
| EPOR        | erythropoietin receptor                                                            |
| ERG         | v-ets erythroblastosis virus E26 oncogene homolog (avian)                          |
| ETS2        | v-ets erythroblastosis virus E26 oncogene homolog 2 (avian)                        |
| EVI1        | ecotropic viral integration site-1                                                 |
| F10         | coagulation factor X                                                               |
| FLI1        | friend leukemia virus integration 1                                                |
| FOXO3       | forkhead box O3                                                                    |
| GABPA       | GA binding protein transcription factor, alpha subunit 60kDa                       |
| GAPDH *     | glyceraldehyde-3-phosphate dehydrogenase                                           |
| GATA1       | GATA binding protein 1 (globin transcription factor 1)                             |
| GATA2       | GATA binding protein 2                                                             |
| GATA3       | GATA binding protein 3                                                             |
| GFI1        | growth factor independent 1 transcription repressor                                |
| GFI1B       | growth factor independent 1B transcription repressor                               |
| GP1BA       | glycoprotein Ib (platelet), alpha polypeptide                                      |
| GP9         | glycoprotein IX (platelet)                                                         |
| GYPA        | glycophorin A (MNS blood group)                                                    |
| HBA2        | hemoglobin, alpha 2                                                                |
| HBB         | hemoglobin, beta                                                                   |
| HBE1        | hemoglobin, epsilon 1                                                              |
| HBG1        | hemoglobin, gamma A                                                                |
| HBZ         | hemoglobin, zeta                                                                   |

|        |                                                                                  |
|--------|----------------------------------------------------------------------------------|
| HMBS   | hydroxymethylbilane synthase                                                     |
| HOXA10 | homeobox A10                                                                     |
| HOXA9  | homeobox A9                                                                      |
| IFI16  | interferon, gamma-inducible protein 16                                           |
| IKZF1  | IKAROS family zinc finger 1 (Ikaros)                                             |
| IL8    | interleukin 8                                                                    |
| INF2   | inverted formin, FH2 and WH2 domain containing                                   |
| IRF1   | interferon regulatory factor 1                                                   |
| ITGA1  | integrin, alpha 1                                                                |
| ITGA2B | integrin, alpha 2b (platelet glycoprotein IIb of IIb/IIIa complex, antigen CD41) |
| JAK3   | Janus kinase 3                                                                   |
| KIT    | proto-oncogene tyrosine-protein kinase Kit) (c-kit) (CD117 antigen)              |
| KLF1   | Kruppel-like factor 1 (erythroid)                                                |
| LDB1   | LIM domain binding 1                                                             |
| LMO2   | LIM domain only 2 (rhombotin-like 1)                                             |
| LMO4   | LIM domain only 4                                                                |
| LRRC39 | leucine rich repeat containing 39                                                |
| LYL1   | lymphoblastic leukemia derived sequence 1                                        |
| MEIS1  | Meis homeobox 1                                                                  |
| MPL    | myeloproliferative leukemia virus oncogene                                       |
| MPO    | myeloperoxidase                                                                  |
| MYB    | v-myb myeloblastosis viral oncogene homolog (avian)                              |
| MYC    | v-myc myelocytomatosis viral oncogene homolog (avian)                            |
| NAB2   | NGFI-A binding protein 2 (EGR1 binding protein 2)                                |
| NCAM1  | neural cell adhesion molecule 1                                                  |
| NFE2   | nuclear factor (erythroid-derived 2), 45kDa                                      |
| NFIX1  | nuclear factor I/X type 1                                                        |
| PBX1   | pre-B-cell leukemia homeobox 1                                                   |
| PF4    | platelet factor 4                                                                |
| PF4V1  | platelet factor 4 variant 1                                                      |
| PPBP   | pro-platelet basic protein (chemokine (C-X-C motif) ligand 7)                    |
| PPIA   | peptidylprolyl isomerase A (cyclophilin A)                                       |
| RCAN1  | regulator of calcineurin 1 (DSCR1)                                               |
| RUNX1  | runt-related transcription factor 1                                              |
| SDHA * | succinate dehydrogenase complex, subunit A, flavoprotein (Fp)                    |
| SELP   | selectin P (granule membrane protein 140kDa, antigen CD62)                       |
| SLC4A1 | solute carrier family 4, anion exchanger, member 1                               |
| SMAD1  | SMAD family member 1                                                             |
| SON    | SON DNA binding protein                                                          |
| SOX17  | SRY (sex determining region Y)-box 17                                            |
| SOX4   | SRY (sex determining region Y)-box 4                                             |
| SOX6   | SRY (sex determining region Y)-box 6                                             |
| SPI1   | spleen focus forming virus (SFFV) proviral integration oncogene spi1             |
| STAT2  | signal transducer and activator of transcription 2, 113kDa                       |
| STAT3  | signal transducer and activator of transcription 3 (acute-phase response factor) |
| TAL1   | T-cell acute lymphocytic leukemia 1                                              |
| TFEC   | transcription factor EC                                                          |
| TP53   | tumor protein p53                                                                |
| TRIM10 | tripartite motif-containing 10                                                   |

|         |                                                        |
|---------|--------------------------------------------------------|
| VDR     | vitamin D (1,25- dihydroxyvitamin D3) receptor         |
| VWF     | von Willebrand factor                                  |
| WNT10A  | wingless-type MMTV integration site family, member 10A |
| ZC3H12C | zinc finger CCCH-type containing 12C                   |
| ZFPM1   | zinc finger protein, FOG family member 1               |

**Table S4.** Forty differentially expressed genes among 94 genes assayed at a single cell level between GATA1s- and wtGATA1-expressing single iPSC-derived CD43<sup>+</sup>41<sup>+</sup>235<sup>+</sup> progenitors (BH-FDR < 0.05), identified using Mann-Whitney *U* test. Mean, mean log<sub>2</sub>(expression); Median, median log<sub>2</sub>(expression); lfc, log<sub>2</sub> of fold change (negative numbers correspond to downregulation in GATA1s- as compared to wtGATA1-expressing cells, whereas positive numbers correspond to upregulation in GATA1s- as compared to wtGATA1-expressing cells). Genes are ordered from largest to smallest absolute value of lfc of means.

| Downregulated (on average) in <i>GATA1s</i> vs. <i>wtGATA1</i> progenitors |                |          |        |        |         |        |              |                |
|----------------------------------------------------------------------------|----------------|----------|--------|--------|---------|--------|--------------|----------------|
| Gene symbol                                                                | <i>P</i> value | BH-FDR   | GATA1s |        | wtGATA1 |        | lfc of means | lfc of medians |
|                                                                            |                |          | Mean   | Median | Mean    | Median |              |                |
| HBZ                                                                        | 1.94E-13       | 6.22E-12 | 3.78   | 2.90   | 6.93    | 5.34   | -3.15        | -2.44          |
| HBG1                                                                       | 1.28E-11       | 2.46E-10 | 6.54   | 6.57   | 9.08    | 10.00  | -2.53        | -3.44          |
| GATA1                                                                      | 7.08E-06       | 4.25E-05 | 6.07   | 7.89   | 8.49    | 8.78   | -2.43        | -0.89          |
| ALAS2                                                                      | 1.99E-11       | 2.73E-10 | 5.20   | 5.82   | 7.60    | 8.78   | -2.40        | -2.96          |
| HBE1                                                                       | 1.90E-06       | 1.22E-05 | 4.80   | 3.13   | 7.13    | 7.03   | -2.33        | -3.90          |
| EPOR                                                                       | 1.84E-17       | 8.82E-16 | 2.97   | 3.02   | 4.84    | 5.49   | -1.86        | -2.47          |
| IL8                                                                        | 3.98E-10       | 4.25E-09 | 2.09   | 1.07   | 3.57    | 3.99   | -1.48        | -2.91          |
| VWF                                                                        | 3.87E-08       | 2.86E-07 | 1.38   | 0.00   | 2.47    | 2.26   | -1.09        | -2.26          |
| GYPA                                                                       | 8.50E-04       | 3.02E-03 | 6.74   | 8.01   | 7.70    | 9.16   | -0.96        | -1.15          |
| HBB                                                                        | 6.87E-05       | 3.14E-04 | 2.89   | 3.13   | 3.74    | 4.03   | -0.85        | -0.90          |
| HBA2                                                                       | 1.81E-03       | 5.80E-03 | 1.06   | 0.00   | 1.84    | 0.00   | -0.78        | 0.00           |
| EPB42                                                                      | 2.40E-03       | 7.45E-03 | 1.37   | 0.00   | 1.97    | 0.00   | -0.60        | 0.00           |
| KLF1                                                                       | 1.41E-04       | 5.40E-04 | 8.29   | 8.92   | 8.87    | 9.44   | -0.58        | -0.52          |
| PPBP                                                                       | 1.44E-03       | 4.78E-03 | 1.47   | 0.00   | 1.99    | 0.51   | -0.52        | -0.51          |
| VDR                                                                        | 1.46E-02       | 3.50E-02 | 1.04   | 0.00   | 1.38    | 0.00   | -0.35        | 0.00           |
| HMBS                                                                       | 1.01E-02       | 2.56E-02 | 6.25   | 6.64   | 6.59    | 6.83   | -0.33        | -0.19          |
| LYL1                                                                       | 8.81E-04       | 3.02E-03 | 5.20   | 5.35   | 5.49    | 5.68   | -0.29        | -0.33          |
| LDB1                                                                       | 5.02E-05       | 2.41E-04 | 9.70   | 9.70   | 9.93    | 10.02  | -0.23        | -0.32          |
| LMO2                                                                       | 8.76E-03       | 2.34E-02 | 9.01   | 9.21   | 9.21    | 9.47   | -0.20        | -0.26          |
| Upregulated (on average) in <i>GATA1s</i> vs. <i>wtGATA1</i> progenitors   |                |          |        |        |         |        |              |                |
| Gene symbol                                                                | <i>P</i> value | BH-FDR   | GATA1s |        | wtGATA1 |        | lfc of means | lfc of medians |
|                                                                            |                |          | Mean   | Median | Mean    | Median |              |                |
| COL24A1                                                                    | 9.74E-13       | 2.34E-11 | 4.17   | 4.99   | 2.23    | 0.00   | 1.95         | 4.99           |
| CSF1R                                                                      | 9.73E-08       | 6.67E-07 | 4.52   | 5.60   | 2.83    | 0.00   | 1.69         | 5.60           |
| CFH                                                                        | 4.94E-11       | 5.92E-10 | 2.09   | 0.00   | 0.77    | 0.00   | 1.32         | 0.00           |
| CD34                                                                       | 1.24E-04       | 4.96E-04 | 4.37   | 5.01   | 3.10    | 0.00   | 1.26         | 5.01           |
| JAK3                                                                       | 1.04E-09       | 9.99E-09 | 5.59   | 6.47   | 4.34    | 5.33   | 1.26         | 1.13           |
| CEBPA                                                                      | 3.43E-09       | 2.75E-08 | 1.66   | 0.00   | 0.60    | 0.00   | 1.06         | 0.00           |
| GFI1                                                                       | 9.79E-05       | 4.27E-04 | 6.01   | 7.57   | 4.96    | 6.53   | 1.04         | 1.05           |
| NCAM1                                                                      | 3.87E-04       | 1.43E-03 | 2.91   | 0.00   | 1.99    | 0.00   | 0.92         | 0.00           |
| TFEC                                                                       | 2.88E-05       | 1.46E-04 | 1.76   | 0.00   | 0.94    | 0.00   | 0.83         | 0.00           |
| MEIS1                                                                      | 2.72E-05       | 1.45E-04 | 7.93   | 8.63   | 7.11    | 7.95   | 0.81         | 0.68           |
| ARHGAP15                                                                   | 1.20E-04       | 4.96E-04 | 2.17   | 0.00   | 1.41    | 0.00   | 0.76         | 0.00           |
| RUNX1                                                                      | 6.46E-20       | 6.20E-18 | 10.97  | 11.12  | 10.22   | 10.33  | 0.74         | 0.78           |

|         |          |          |       |       |      |       |      |      |
|---------|----------|----------|-------|-------|------|-------|------|------|
| FLI1    | 1.93E-11 | 2.73E-10 | 9.27  | 9.81  | 8.53 | 9.10  | 0.74 | 0.70 |
| INF2    | 1.44E-09 | 1.26E-08 | 7.70  | 7.76  | 7.05 | 7.27  | 0.66 | 0.49 |
| ZC3H12C | 1.01E-02 | 2.56E-02 | 2.57  | 0.00  | 1.92 | 0.00  | 0.65 | 0.00 |
| KIT     | 1.57E-02 | 3.59E-02 | 5.55  | 6.52  | 4.90 | 5.84  | 0.65 | 0.68 |
| PF4V1   | 1.49E-02 | 3.50E-02 | 3.34  | 2.89  | 2.73 | 2.03  | 0.60 | 0.87 |
| BCL11A  | 6.80E-03 | 1.92E-02 | 1.90  | 0.00  | 1.38 | 0.00  | 0.52 | 0.00 |
| GATA2   | 5.76E-03 | 1.68E-02 | 10.10 | 10.39 | 9.68 | 10.09 | 0.42 | 0.30 |
| SMAD1   | 1.04E-02 | 2.56E-02 | 6.81  | 7.29  | 6.58 | 7.10  | 0.23 | 0.19 |
| DYRK1A  | 3.92E-03 | 1.17E-02 | 8.94  | 8.99  | 8.75 | 8.74  | 0.19 | 0.25 |

**Table S5.** Top 40 functional enrichment terms from GREAT analysis on genes assigned to sites that were differentially bound between GATA1fl and GATA1s in G1ME cells. Enrichment analysis was performed on (i) genes assigned to 1,882 sites bound > 2-fold more by GATA1fl vs. GATA1s as well as on (ii) genes assigned to 2,612 sites bound > 2-fold more by GATA1s vs. GATA1fl. Listed are top 10 “mouse phenotype” and top 10 “GO biological processes” terms from both analyses. Based on the names of the enrichment terms, we grouped them into five categories: erythroid, megakaryocytic, myeloid, other hematopoietic, and cardiovascular and other.

| Database              | Enrichment term                                    | Genes bound more by GATA1fl |                          | Genes bound more by GATA1s |                          |
|-----------------------|----------------------------------------------------|-----------------------------|--------------------------|----------------------------|--------------------------|
|                       |                                                    | binomial FDR                | binomial fold enrichment | binomial FDR               | binomial fold enrichment |
| Erythroid terms       |                                                    |                             |                          |                            |                          |
| Mouse Phenotype       | abnormal mean corpuscular volume                   | 8.52E-20                    | 7.35                     | -                          | -                        |
| Mouse Phenotype       | abnormal erythrocyte morphology                    | 7.81E-18                    | 2.60                     | -                          | -                        |
| Mouse Phenotype       | abnormal mean corpuscular hemoglobin               | 1.44E-17                    | 8.79                     | -                          | -                        |
| Mouse Phenotype       | reticulocytosis                                    | 1.66E-17                    | 7.29                     | -                          | -                        |
| Mouse Phenotype       | abnormal hemoglobin                                | 3.66E-17                    | 3.98                     | -                          | -                        |
| Mouse Phenotype       | abnormal erythrocyte cell number                   | 7.92E-17                    | 3.59                     | -                          | -                        |
| Mouse Phenotype       | increased red blood cell distribution width        | 8.25E-17                    | 7.59                     | -                          | -                        |
| Mouse Phenotype       | abnormal erythropoiesis                            | 8.30E-17                    | 2.41                     | -                          | -                        |
| Mouse Phenotype       | hemolytic anemia                                   | 1.60E-16                    | 14.45                    | -                          | -                        |
| GO Biological Process | erythrocyte homeostasis                            | 9.92E-06                    | 3.99                     | -                          | -                        |
| GO Biological Process | erythrocyte differentiation                        | 2.13E-05                    | 3.91                     | -                          | -                        |
| GO Biological Process | porphyrin-containing compound biosynthetic process | 4.40E-05                    | 9.60                     | -                          | -                        |
| Megakaryocytic terms  |                                                    |                             |                          |                            |                          |
| Mouse Phenotype       | abnormal platelet physiology                       | -                           | -                        | 8.19E-07                   | 3.09                     |
| Mouse Phenotype       | abnormal megakaryocyte morphology                  | -                           | -                        | 2.37E-05                   | 2.23                     |
| Mouse Phenotype       | abnormal platelet activation                       | -                           | -                        | 4.51E-05                   | 3.37                     |
| Mouse Phenotype       | abnormal megakaryocyte differentiation             | -                           | -                        | 6.95E-05                   | 6.01                     |
| Mouse Phenotype       | abnormal platelet aggregation                      | -                           | -                        | 1.47E-04                   | 3.31                     |

| Myeloid terms                  |                                                                 |          |      |          |      |
|--------------------------------|-----------------------------------------------------------------|----------|------|----------|------|
| GO Biological Process          | regulation of granulocyte chemotaxis                            | -        | -    | 1.19E-02 | 5.71 |
| GO Biological Process          | positive regulation of myeloid leukocyte differentiation        | -        | -    | 1.29E-02 | 3.47 |
| GO Biological Process          | regulation of leukocyte migration                               | -        | -    | 1.54E-02 | 2.59 |
| Other hematopoietic terms      |                                                                 |          |      |          |      |
| Mouse Phenotype                | abnormal lymph organ size                                       | 2.55E-17 | 2.17 | -        | -    |
| GO Biological Process          | regulation of myeloid cell differentiation                      | 5.20E-09 | 6.61 | -        | -    |
| GO Biological Process          | negative regulation of Ras protein signal transduction          | 8.46E-05 | 6.15 | -        | -    |
| Mouse Phenotype                | abnormal hematopoietic system physiology                        | -        | -    | 3.19E-08 | 2.16 |
| Mouse Phenotype                | decreased interferon-gamma secretion                            | -        | -    | 2.37E-06 | 2.47 |
| Mouse Phenotype                | abnormal type IV hypersensitivity reaction                      | -        | -    | 4.15E-06 | 3.29 |
| Mouse Phenotype                | increased IgG1 level                                            | -        | -    | 1.48E-04 | 2.89 |
| GO Biological Process          | positive regulation of tyrosine phosphorylation of STAT protein | -        | -    | 1.60E-02 | 3.20 |
| Cardiovascular and other terms |                                                                 |          |      |          |      |
| GO Biological Process          | fatty acid metabolic process                                    | 7.64E-05 | 2.45 | -        | -    |
| GO Biological Process          | regulation of ARF protein signal transduction                   | 4.13E-04 | 4.20 | -        | -    |
| GO Biological Process          | homeostasis of number of cells                                  | 4.28E-04 | 2.43 | -        | -    |
| GO Biological Process          | organophosphate metabolic process                               | 7.58E-04 | 2.21 | -        | -    |
| GO Biological Process          | progesterone receptor signaling pathway                         | 8.77E-04 | 7.18 | -        | -    |
| Mouse Phenotype                | abnormal physiological neovascularization                       | -        | -    | 1.08E-06 | 5.94 |
| GO Biological Process          | regulation of smooth muscle cell proliferation                  | -        | -    | 1.43E-02 | 2.45 |
| GO Biological Process          | cardiac muscle fiber development                                | -        | -    | 1.61E-02 | 6.73 |
| GO Biological Process          | positive regulation of osteoclast differentiation               | -        | -    | 1.63E-02 | 4.36 |
| GO Biological Process          | positive regulation of behavior                                 | -        | -    | 3.49E-02 | 2.06 |
| GO Biological Process          | regulation of vasoconstriction                                  | -        | -    | 4.51E-02 | 2.51 |
| GO Biological Process          | regulation of bone resorption                                   | -        | -    | 4.54E-02 | 3.45 |

## **SUPPLEMENTAL METHODS**

### **Experimental procedures:**

#### **Cell culture**

Stromal and fibroblast lines were cultured in fibroblast growth media consisting of DMEM (Mediatech), 10% fetal bovine serum, 2mM glutamine (Invitrogen), 1% penicillin/streptomycin (Gibco), 100 uM nonessential amino acids (NEAAs, Invitrogen), 0.1 mM  $\beta$ -mercaptoethanol (BME) and 4 ng/ml bFibroblast growth factor (bFGF, Invitrogen). Mononuclear cells (MNCs) were cultured in QBSF-60 media (Quality Biological, Inc.) supplemented with stem cell factor (SCF) 100 ng/ml, thrombopoietin (TPO) 50 ng/ml, Flt3-ligand (Flt3L) 50 ng/ml, Interleukin-3 (IL-3) 10 ng/ml, and 1% penicillin/streptomycin (Gibco). Human embryonic stem cell (hESC) media consisted of DMEM/F12 50/50 (Mediatech), 20% knockout serum replacement (Invitrogen), 2mM L-glutamine, 1% penicillin/streptomycin, 100 uM non-essential amino acids (NEAAs), 0.1 mM  $\beta$ -mercaptoethanol, and 10 ng/ml bFibroblast growth factor (bFGF). All iPSC lines were maintained with hESC media and on irradiated mouse embryonic fibroblasts (MEFs). Cultures were split weekly after incubation with TrypLe (Invitrogen) for 3-5 minutes and then mechanically disaggregated and plated on fresh MEFs. GATA1<sup>-</sup> megakaryocyte-erythroid (G1ME) cells were maintained as described (3) in thrombopoietin (TPO)-conditioned media prepared from cells engineered to express murine TPO.

#### **Generation and maintenance of induced pluripotent stem cells (iPSCs)**

To reprogram fibroblasts and mononuclear cells, 40,000 and 200,00 cells respectively were infected with 5 microliters each of concentrated pHage2-CMV-RTTA-W and pHage-Tet-hSTEMMCA-loxP virus in the presence of 5 mcg/mL polybrene, and spinoculated at 2,250 rpm at 25°C for 1.5 hours (2, 4). One half of the media was replaced after infection. Twenty-four

hours later, cells were resuspended in fresh media with 1 mcg/mL doxycycline. Cells were split onto irradiated MEFs 3-6 days after infection and colonies were picked 21-28 days after infection and expanded. After ten days, media was switched to hESC media. Doxycycline was removed after colonies appeared.

### **Flow cytometry**

Antibodies included anti-human CD43 FITC, CD41a PE, CD42a FITC, CD235a APC or PE, CD71 APC or PE, CD18 APC, CD34 PE-Cy7, Tra-1.60 FITC, Tra-1.81 AF555 (BD Biosciences); CD31 PE-Cy7, CD45 Pacific blue, SSEA3 AF488, SSEA4 AF647 (Biolegend); VEGFR2/KDR PE (R&D Systems); CD117 (Invitrogen) and anti-mouse Ter119 APC, CD41 PE (BD Biosciences), and Gp1b PE (Emfret Analytics). Cells were stained in PBS/1%BSA at 25°C for 20 minutes and analyzed on a FacsCanto (BD Biosciences) and with FloJo software (Tree Star, Ashlan, OR), or sorted on a FACSDiva (BD Biosciences).

### **Teratoma assay**

For teratoma formation, 1 million feeder-depleted iPSCs were resuspended in 1:6 Matrigel (BD Biosciences) diluted in IMDM and injected intramuscularly into nonobese diabetic/severe combined immunodeficient mice. Teratomas were harvested 6-8 weeks later and paraffin sections were stained with haematoxylin and eosin. Animal experiments were performed in accordance with institutional guidelines.

### **Karyotyping**

Karyotyping of iPSCs was performed at the Coriell Institute of Medical Research (Camden, NJ) and the Children's Hospital of Philadelphia Cytogenetics Laboratory (Philadelphia, PA).

### **GATA1 mutational analysis**

DNA was extracted from primary patient samples and resultant iPSC clonal lines. For primary patient samples and iPSC clones with splice site mutations, *GATA1* exon 2 was amplified by PCR, fragments were cloned into the TOPO-TA vector (Invitrogen), and direct sequencing was performed using M13 standard primers, F: GTAAAACGACGGCCAG, R: CAGGAAACAGCTATGAC. For most iPSC clones, *GATA1* exon 2 was amplified by PCR, and direct sequencing was performed on the PCR product with the following primers: *GATA1* exon 2, F: AAGAGGAGCAGGTGAAAGGATGTGG, R: TGACCTAGCCAAGGATCTCCATGGCAAC.

### **Hematopoietic differentiation by embryoid body formation**

EBs were cultured in StemPro-34 (Invitrogen) media supplemented with 2 mM glutamine, 50 mcg/ml ascorbic acid, 150 mcg/ml transferrin, 0.4 mM monothioglycerol, and with bone morphogenic protein 4 (BMP4) 25 ng/ml, vascular endothelial growth factor (VEGF) 50 ng/ml (day 0-2); BMP4 25 ng/ml, VEGF 50 ng/ml, stem cell factor (SCF) 50 ng/ml, thrombopoietin (TPO) 50 ng/ml, FLT3-ligand (FLT3) 50 ng/ml, fibroblast growth factor (bFGF) 20 ng/ml (day 2-4); VEGF 50 ng/ml, SCF 50 ng/ml, TPO 50 ng/ml, FLT3 50 ng/ml, bFGF 20 ng/ml (day 4-8); SCF 50 ng/ml, TPO 50 ng/ml, interleukin-3 (IL-3) 10 ng/ml, interleukin-11 (IL-11) 5 ng/ml, erythropoietin (EPO) 2 U/ml, and insulin growth factor-1 (IGF-1) 25 ng/ml (day 8+). All cytokines except EPO (Amgen) and bFGF (Invitrogen) were purchased from R&D Systems. Cultures were maintained at 37°C, 5% CO<sub>2</sub>, 5% O<sub>2</sub>, and 90% N<sub>2</sub>.

### **Preparation of cells from embryoid bodies**

To assay embryoid bodies (EB), suspension cells were collected from the supernatant by harvesting EB cultures and centrifuging at 600 rpm for 1 minute. To analyze total EB cultures, EBs were dissociated to single cells by a 1 hour incubation with 0.2% Collagenase B containing 20% serum followed by a 2 minute incubation with trypsin (0.05% trypsin-EDTA) at 37°C. After

enzymatic treatment, 1 ml serum was added and the EBs were disaggregated to single cells by multiple passages through a 20-gauge needle.

### **Hematopoietic colony-forming and liquid culture assays**

CD41<sup>+</sup>235<sup>+</sup> cells were seeded into H4230 methylcellulose (Stem Cell Technologies) with EPO 5 U/ml, IL-3 10 ng/ml, SCF 5 ng/ml, and granulocyte-macrophage colony stimulating factor (GMCSF) 5 ng/ml, at 2,000 - 5,000 cells/ml. Colonies were scored at 12 days. 2,000-5,000 cells/ml were seeded into Megacult-C (Stem Cell Technologies) with TPO 50 ng/ml, interleukin-6 (IL-6) 10 ng/ml, and IL-3 10 ng/ml. After 12 days, cultures were dehydrated, fixed, and stained with anti-GPIIb/IIIa antibody. For liquid culture assays, progenitor cells isolated from day 7-8 EB differentiation cultures were grown on OP9 feeder cells in serum free differentiation (SFD) medium consisting of Iscove's Minimal Essential Media (IMDM, Life Technologies) containing 25% Ham's F12 (Cellgro) supplemented with 0.5% N2 (Life Technologies), 1% B27 without Vitamin A (Life Technologies), and 0.05% BSA diluted in PBS (Sigma). The SFD media is supplemented with 2 mM glutamine (Cellgro), 50 mg/ml ascorbic acid (Sigma), and  $4 \times 10^{-4}$  M monothioglycerol (Sigma) before use. The following cytokines were used for lineage specific cultures: erythroid, EPO 2U/ml, SCF 100 ng/ml; megakaryocyte, SCF 100 ng/ml, TPO 50 ng/ml; and myeloid, SCF 100 ng/ml, IL-3 5 ng/ml, IL-5 5 ng/ml, and GMCSF 5 ng/ml.

### **Morphologic analysis**

Cells were centrifuged onto a glass slide and stained with May-Grunwald-Giemsa (Sigma). Light microscopy images were obtained with a Zeiss Axioskope 2 microscope, AxioCam camera, and AxioVision 4.8 software (Carl Zeiss Microimaging).

### **Constructs**

The human GATA1 coding sequence was cloned into the lentiviral vector HMD containing GFP to generate HMD-GATA1. The GATA1s (GATA1 lacking amino acids 1-83) mutant was amplified by PCR and inserted into HMD to generate HMD-GATA1s. The murine GATA1 coding sequence was cloned into the MSCV-based retroviral vector MIGR1 with a single HA tag (YPYDVPDYA) at the N-terminus to generate MIGR1-HA-GATA1. The GATA1s (GATA1 lacking amino acids 1-83) mutant was amplified by PCR with a single HA tag at the N-terminus and inserted into MIGR1 to generate MIGR1-HA-GATA1s.

### **Lentiviral transduction**

The HMD lentiviral vector was used to express human wt GATA1 or truncated human GATA1s in CD41<sup>+</sup>235<sup>+</sup> iPSC-derived progenitor cells. Viral particles were generated by transient transfection of 293T cells using Lipofectamine 2000 according to manufacturer's instructions, and viral supernatant collected and concentrated 100x 48 hours after transfection. For lentiviral transduction, 1.5 µl of concentrated virus was used per 1 x 10<sup>5</sup> cells in the presence of 2 ng/mL polybrene and 10 mM HEPES in 1 well of a 96-well plate and spun at 2250 rpm for 90 minutes at 37 °C.

### **Retroviral transduction**

Retroviral infections of G1ME cells were carried out as described (5). The retroviral vector MIGR1 was used to express fl or mutant murine HA tagged GATA1 in G1ME cells. Viral particles were generated by transient transfection of Plat-E retrovirus packaging cells using Lipofectamine 2000 according to manufacturer's instructions, and viral supernatant collected 48 hours after transfection. For retroviral transduction, 1.2 - 1.5 mL of retroviral supernatant was mixed with 0.8 - 0.5 mL G1ME media and 2 x 10<sup>6</sup> cells in the presence of 8 ng/mL polybrene and 10 mM HEPES in 1 well of a 6-well plate and spun at 3200 rpm for 90 minutes at 37 °C.

Cells were incubated at 37 °C in 5% CO<sub>2</sub> for 3 hours and then resuspended in 5 mL fresh media. EPO 2 U/mL was added to G1ME cell transductions to support erythro-megakaryocytic differentiation.

**Semi-quantitative real time polymerase chain reaction (RT-PCR) primers used:**

Human RT-PCR primers (5' to 3'):

*Cyclophilin*

Forward GAAGAGTGCGATCAAGAACCCATGAC  
Reverse GTCTCTCCTCCTTCTCCTCCTATCTTTACTT

*DNMT3B*

Forward TACAGACGTGTGCAGTTGTAGGCA  
Reverse GTGCAGACTCCAGCCCTTGTATTT

*REX1*

Forward AAAGCATCTCCTCATTCATGGT  
Reverse TGGGCTTTCAGGTTATTTGACT

*ABCG2*

Forward TCAGGAGACCACATTTTCATCTAGCCC  
Reverse CAGGGCACCCACTGACAAACTAAA

*NANOG*

Forward CCTGAAGACGTGTGAAGATGAG  
Reverse GCTGATTAGGCTCCAACCATAC

For expression of lentivirus transgene OCT4-KLF4

Forward GGT GCG CCA GTA AAG CAG ACA TTA AA  
Reverse CAG ACG CGA ACG TGG AGA AAG A

*GATA1*

Forward AGA TGA ATG GGC AGA ACA GG  
Reverse ATT TCT CCG CCA CAG TGT C

*BAND3*

Forward TCT CTG GGA AGG TCA CAC ACC TGA  
Reverse ACA CAC GGT AGG TGT GAT CCT GTT

*ALAS2*

Forward CCT TTG AGA CTG TCC ACT CCA  
Reverse GGT GGG ACA CAT CAC ACA AC;

*KLF1*

Forward CAT CAG CAC ACT GAC CGC CCT G,  
Reverse CAT GTC CTG CGC CTC TTC GG;

*GYPA*

Forward AGG GTA CAA CTT GCC CAT CA

Reverse ACC AGC CAT CAC CCC AAA

Murine RT-PCR primers (5' to 3'):

*Alas2*

Forward TATGTGCAGGCCATCAACTACCCA

Reverse TTTCCATCATCTGAGGGCTGTGGT

*Gp1ba*

Forward CTTGTTGCCAACGACCAAGCTGAA

Reverse AAGCCCTTTGGTATTGTGCGAAGC

*Gypa*

Forward TCACACGGCCCCTACTGAAGTGT

Reverse TCCCTGCCATCACGCGGAAAT

*Klf1*

Forward CACGCACACGGGAGAGAAG

Reverse CGTCAGTTCGTCTGAGCGAG

*Pf4*

Forward TTCTGGGCCTGTTGTTTCTG

Reverse GATCTCCATCGCTTTCTTCG

*Thbs1*

Forward TAGCTGAGGCGGATCAGCAAATCT

Reverse GGGAAGCCAAAGGAGTCCAAATCA

*Vwf*

Forward TCATCGCTCCAGCCACATTCCATA

Reverse AGCCACGCTCACAGTGGTTATACA

*Zfp1*

Forward CCTTGCTACCGCAGTCATCA

Reverse ACCAGATCCCGCAGTCTTTG

ChIP qPCR primers (5' to 3')

*Alas2* +2 kb

F' AGGGCAGGACTTTGCCTCTAATCT

Reverse AGATGTCCCAGTTCCTGCAGGTTT

*Capn2* +13 kb

F' TAATGGGAGTTCCCAGCATTT

Reverse GCACAAGAGAGGATGACCTTAT

*Eraf* prom

F' TGCCTGCGTCTCGCTTAGT  
Reverse GCTGAGCCCCGCCTCATC

*Ermap* +1.7 kb

F' GGACAGATTCAGGAGGAGAGTA  
Reverse CTTTGACCTCTGAGCTATGAT

*Fli1* prom

F' GCCCAGTTACATTCATGCAC  
Reverse TGCAGACTTCAGGAATCAGG

*Gp1ba* prom

F' TGGTGGCTAGTAGCTGCAAAGTC  
Reverse TTATCAGCTCTCTGCACAGCATTC

*Gypa* prom

F' GCAGTTATGCAGACCTCTAGTT  
Reverse CCTCTATCCGTTGACACACATT

*Hbb-b1* prom

F' CAGGGAGAAATATGCTTGTCATCA  
Reverse GTGAGCAGATTGGCCCTTACC

*Hbb* HS3

F' CTAGGGACTGAGAGAGGCTGCTT  
Reverse ATGGGACCTCTGATAGACACATCT

*Itga2b* prom

F' TCCTGCTCTTGAATGCTGTG  
Reverse GGGAGGAAGTGGGTAAATGTC

*Klf1* prom

F' TCTGCTCAAGGAGGAACAGAGCTA  
Reverse GGCTCCCTTTCAGGCATTATCAGA

*Lrrc39* prom

F' TTCCCTGGTGTCTGTAGGAACACA  
Reverse GGGCTTCTGTGCAAAGGTTCAACT

*Lyl1* prom

F' TCAGCATTGCTTCTTATCAGCC  
Reverse CGCAGAGGCCAGAGGATG

*Myh9* +5 kb

F' CACGATTACGGTGACCTTTCTA  
Reverse CTTGACTGTGCAGAAGGAAATG

*Pf4* prom

F' GCTGCTGGCCTGCACTTAAG  
Reverse GCCACTGGACCCAAAGATAAAG

*Src* +5 kb  
Forward TTTCTGTCCTGAAGTGGGTGGAA  
Reverse TGGATGGCTACAGCCACCTTAACT

*Thbs1* -45 kb  
Forward TCACGCTGTGTTGATGAGAGCAGA  
Reverse ACTGGGTAGCAGTTCCAAGGGATT

*Tubb1* +3 kb  
Forward CTGTGTTGACTTGAAGGCCTTTGG  
Reverse TGACTCCTGTGGCACATAAGGGTA

*Vwf* -11 kb  
Forward ATATCAGGCCTTTCCTCCAAGGGT  
Reverse GCAACTGCCTGCCATGCTATCAAT

*Zfpm1* +2 kb  
Forward CTTTTCTCCTGCCCAGTCG  
Reverse TGCTGTTGCCTCGAACC

## **Bioinformatics analysis:**

### **Microarray transcriptome analysis**

Affymetrix HuGene 1.0 ST CEL data files were processed using RMA method implemented by the “oligo” package in R (6-8). 33,297 transcripts were collapsed to 19,392 RefSeq genes. If several transcripts mapped to one RefSeq gene, expression values were averaged to obtain one value per gene. In order to investigate differential expression on genomewide microarray data, we performed a moderated *t* test on the whole set of 19,392 genes, comparing expression of genes between T21/*GATA1s* (3 replicates) and T21/*wtGATA1* (6 replicates) iPSC-derived progenitors, using Bioconductor R “limma” (Linear Models for Microarray Data) package (9). Next, 8,519 genes that were silent (i.e. displayed  $\log_2(\text{expression}) < 5$ ) across all 9 microarrays were filtered out from further analysis. Moderated *t* test *P* values were then corrected for multiple comparisons using BH-FDR method (10). We identified 273 differentially expressed genes (BH-FDR < 0.1), out of which 56 displayed an absolute value of  $\log_2(\text{fold change}) \geq 1$  (i.e. absolute value of fold change  $\geq 2$ ).

To identify which of the differentially expressed genes are GATA1 targets (i.e. genes that are bound by GATA1 at one or more sites within a 10 kb-gene neighborhood, i.e. 10 kb upstream of TSS + gene body + 10 kb downstream of TES), we used DNA segments occupied by GATA1 in human peripheral blood-derived erythroblasts (PBDE) and peripheral blood-derived erythroblasts from 16-19 week human fetal liver (PBDEFetal). These ChIP-seq peaks were obtained from ENCODE data (11) generated in the Snyder and Farnham labs, downloaded from the UCSC Genome Browser (12) as UCSC Accession numbers wgEncodeEH001765 and wgEncodeEH001785, and file names: wgEncodeSydhTfbsPbdeGata1UcdPk.narrowPeak.gz and wgEncodeSydhTfbsPbdefetalGata1UcdPk.narrowPeak.gz, respectively; genome assembly hg19.

Specifically, we intersected gene neighborhoods of 56 genes that were  $\geq 2$ -fold up- or downregulated between GATA1s- and wtGATA1-expressing progenitors with GATA1 ChIP-seq peaks from PBDE and PBDEFetal cell lines. Among the 19,392 RefSeq genes represented on Affymetrix HuGene 1.0 ST microarray, 8,839 were occupied by GATA1 in PBDE and/or PBDEFetal cell lines. Therefore, an expected fraction of GATA1s targets in a randomly sampled set of genes is ~45%. We found that 19 out of 22 genes (~86%) downregulated in *GATA1s* as compared to *wtGATA1* progenitors were bound by GATA1 (Table S2), and thus were likely GATA1 targets. This corresponds to ~2-fold enrichment over what is expected by chance (binomial test  $P$  value =  $10^{-4}$ ). Conversely, although 20 out of 34 genes (59%) upregulated in T21/*GATA1s* cells were bound by GATA1 in human PBDE and/or PBDEFetal cells (Table S2), this is not significantly different from random expectation (1.3-fold enrichment; binomial test  $P$  value = 0.084).

To further characterize differentially expressed genes we used GSEA (13, 14) in which we utilized microarray expression data for several human hematopoietic cell populations from Novershtern *et al.* (1). Specifically, to define erythroid, myeloid, and megakaryocytic transcriptome signature we used microarray data from the following cell populations: (i) erythroid signature: Erythroid CD34-CD71lowGlyA+ cells (7 replicates), and Erythroid CD34-CD71-GlyA+ cells (6 replicates); (ii) myeloid signature: basophils (6 replicates), eosinophils (5 replicates), and neutrophils (4 replicates); and (iii) megakaryocytic signature: CFU-megakaryocytes (5 replicates), and megakaryocytes (7 replicates). We performed two GSEAs: (i) GSEA on all 273 differentially expressed genes (154 genes up- and 119 genes downregulated in GATA1s- as compared to wtGATA1-expressing progenitors, BH-FDR < 0.1) (Figure 4B); and (ii) GSEA on 56 differentially expressed genes (34 up- and 22 downregulated genes) that not only pass the BH-FDR threshold of < 0.1, but also display an absolute value of  $\log_2(\text{fold change}) \geq 1$  (Figure S4). To assess the significance of enrichment scores we performed 1000 “phenotype” permutations. Processing of human euploid microarray samples and analysis done to generate Figure S5 were performed analogously to what is described above for trisomy 21 samples. Heat maps in Figures 4, S5, and S7 were prepared using HeatMapImage module at <http://genepattern.broadinstitute.org/> (15).

Mouse G1ME transcriptome analysis using Affymetrix Mouse Genome 430 2.0 microarrays, comparing mean expression of genes in G1ME/GATA1s vs. G1ME/GATA1fl (3 replicates each), was done as described above for human iPSC-derived progenitor samples with few differences. RMA processing was done using “affy” package in R (16). After RMA processing 45,101 probesets were mapped to 21,246 genes. After the moderated *t* test was performed and before the BH-FDR multiple test correction was applied, 4,916 genes that were silent (i.e. displayed  $\log_2(\text{expression}) < 4$ ) across all 6 microarrays were removed from further analysis. We identified 61 genes that were significantly downregulated and 75 genes that were significantly

upregulated (FDR < 0.1 & absolute value of fold change  $\geq 2$ ) in G1ME/GATA1s vs. G1ME/GATA1f.

### Single cell gene expression analysis

Expression levels for 94 selected genes (Table S3), including 91 key hematopoietic genes and 3 housekeeping genes, in single cells purified by flow cytometry from iPSC differentiation cultures, were measured by quantitative RT-PCR. Cycle threshold (Ct) numbers were downloaded from the Fluidigm BioMark software and used to calculate relative  $\log_2$ (expression level) of analyzed genes in single cells using the following formula from the Fluidigm “Application Guidance: Single-Cell Data Analysis” manual as per manufacturer instructions:

$$\log_2(G_i) = LOD - Ct_i$$

where  $G_i$  is the relative expression of gene  $i$ ,  $LOD = 24$  is the selected limit of detection, and  $Ct_i$  is the cycle threshold number of gene  $i$ . If value is negative,  $\log_2(G_i) = 0$ .

Cells with low expression (i.e. > 3 standard deviations away from the median expression across all single cells analyzed) of two housekeeping genes, ACTB and GAPDH, were excluded from further analyses, resulting in a total of 755 single cells. These cells included CD41<sup>+</sup>235<sup>+</sup> progenitors from GATA1s (n = 274) or wtGATA1 (n = 311) iPSCs. As controls, lineage-committed erythroid (CD41<sup>+</sup>235<sup>+</sup>, n = 57), megakaryocytic (CD41<sup>+</sup>42<sup>+</sup>, n = 61), and myeloid (CD45<sup>+</sup>18<sup>+</sup>, n = 52) cells were examined (Figure 5A). Data was normalized using additive correction on the logarithmic scale so that all cells have the same median  $\log_2$ (expression value) of detected genes (i.e. genes whose  $\log_2(G_i)$  is > 0) equal to the average median expression across all cells.

PCA was performed using princomp(x) function in MATLAB on single cell gene expression data for erythroid, megakaryocytic, and myeloid reference cells. This resulted in an identification of

the first two principal components – PC1 and PC2 – which accounted for 65% of the variance in the data and resulted in clear clustering of the three reference cell types (Figure 5B, left). To project the expression patterns of *wtGATA1* and *GATA1s* progenitor cells onto PC1 and PC2 plane identified for committed cells, we first shifted the progenitor expression data using the shift that was applied to committed cells during data centering for PCA. We then used PC1 and PC2 loadings (coefficients) obtained from PCA on committed cells to calculate PC1 and PC2 scores, i.e. projection of expression patterns of each progenitor cell onto PC1 and PC2 (Figure 5B). To investigate whether *GATA1s*- and *wtGATA1*-expressing progenitors differ significantly along the PC1 direction we performed a Mann Whitney *U* test comparing PC1 score distributions of these two populations of cells.

We used PC1 and PC2 scores shown in Figure 5B, as predictor variables in Linear Discriminant Analysis (LDA) to classify *wtGATA1* and *GATA1s* progenitors into erythroid, myeloid, or megakaryocytic lineage. Specifically, we used projections of committed cells onto PC1 and PC2 to train an LDA model that discriminates the three lineages (*lda(x)* function from MASS package in R (17)). The trained model was 98% correct in classifying the committed cells into their respective lineages. We then used this model to assign, to each progenitor cell expressing *wtGATA1* or *GATA1s*, probabilities of belonging to an erythroid, myeloid, or megakaryocytic lineage. Biologically, these probabilities can be used to approximate the likelihood with which a particular progenitor cell will differentiate towards a given lineage. Next, we assigned each progenitor cell into one of four categories: erythroid, megakaryocytic, or myeloid using a probability threshold of  $> 0.90$ , or unclassified if all three probabilities assigned to a cell were  $< 0.90$ .

For each of the 94 genes interrogated, we also analyzed distributions of expression levels among single cells (see violin plots in Figures 5D and S6). Specifically, to investigate whether

these distributions differed significantly between populations of single iPSC-derived progenitors expressing GATA1s or wtGATA1, the non-parametric Mann-Whitney *U* test was performed, followed by a multiple comparison correction using BH-FDR method (10).

Violin plots in Figures 5D and S6 were prepared using “vioplot” package in R (18). Hierarchical clustering heat maps in Figure 6B were prepared using heatmap.2(x) from “gplots” package in R (19). Hierarchical clustering was performed using complete linkage method and Euclidean measure of distance.

### **Genomewide differential binding analysis on ChIP-seq data.**

We performed ChIP-seq analysis on GATA1fl (2 replicates) and GATA1s (2 replicates) in G1ME cells at 42 hours post-transduction. For GATA1fl samples, we called 24,579 peaks in replicate 1 and 14,328 peaks in replicate 2, with 9,205 peaks present in both GATA1fl replicates. For GATA1s samples, we called 26,024 peaks in replicate 1, and 28,420 peaks in replicate 2, with 13,657 peaks present in both GATA1s replicates. Differential binding analysis was performed using “DiffBind” package in R (20, 21) on GATA1fl and GATA1s binding sites that were called as peaks in both respective replicates (9,205 peaks for GATA1fl and 13,657 peaks for GATA1s). In total 16,231 binding sites, representing a union of GATA1fl and GATA1s peaks (after merging of peaks that overlap between GATA1fl and GATA1s), were included in differential binding analysis. To remove background noise, control read counts from matching input samples were subtracted from respective ChIP-seq samples before analysis. Read counts obtained for each of 4 replicates at 16,231 binding sites were normalized using “effective library size”, i.e. number of reads within peaks. Differential binding analysis was performed using edgeR method implemented by “DiffBind”. Binding sites were called as differentially bound using FDR threshold of  $< 0.1$ . Differentially bound sites with  $> 2$ -fold change in binding signal

were assigned to predicted target genes using GREAT (22). This was achieved using “single nearest gene within 1Mb” option for associating genomics regions with genes.

## SUPPLEMENTAL REFERENCES

1. Novershtern N, Subramanian A, Lawton LN, Mak RH, Haining WN, McConkey ME, Habib N, Yosef N, Chang CY, Shay T, et al. Densely interconnected transcriptional circuits control cell states in human hematopoiesis. *Cell*. 2011;144(2):296-309.
2. Chou ST, Byrska-Bishop M, Tober JM, Yao Y, Vandorn D, Opalinska JB, Mills JA, Choi JK, Speck NA, Gadue P, et al. Trisomy 21-associated defects in human primitive hematopoiesis revealed through induced pluripotent stem cells. *Proc Natl Acad Sci U S A*. 2012;109(43):17573-8.
3. Stachura DL, Chou ST, and Weiss MJ. Early block to erythromegakaryocytic development conferred by loss of transcription factor GATA-1. *Blood*. 2006;107(1):87-97.
4. Sommer CA, Stadtfeld M, Murphy GJ, Hochedlinger K, Kotton DN, and Mostoslavsky G. Induced pluripotent stem cell generation using a single lentiviral stem cell cassette. *Stem Cells*. 2009;27(3):543-9.
5. Chou ST, Khandros E, Bailey LC, Nichols KE, Vakoc CR, Yao Y, Huang Z, Crispino JD, Hardison RC, Blobel GA, et al. Graded repression of PU.1/Sfpi1 gene transcription by GATA factors regulates hematopoietic cell fate. *Blood*. 2009;114(5):983-94.
6. Carvalho BS, and Irizarry RA. A framework for oligonucleotide microarray preprocessing. *Bioinformatics*. 2010;26(19):2363-7.
7. Gentleman RC, Carey VJ, Bates DM, Bolstad B, Dettling M, Dudoit S, Ellis B, Gautier L, Ge Y, Gentry J, et al. Bioconductor: open software development for computational biology and bioinformatics. *Genome Biol*. 2004;5(10):R80.

8. Irizarry RA, Bolstad BM, Collin F, Cope LM, Hobbs B, and Speed TP. Summaries of Affymetrix GeneChip probe level data. *Nucleic Acids Res.* 2003;31(4):e15.
9. Smyth GK. Linear models and empirical bayes methods for assessing differential expression in microarray experiments. *Stat Appl Genet Mol Biol.* 2004;3(Article3).
10. Benjamini Y, and Hochberg Y. Controlling the false discovery rate – a practical and powerful approach to multiple testing. *Journal of the Royal Statistical Society Series B-Methodological.* 1995;57(289-300).
11. ENCODE Project Consortium. An integrated encyclopedia of DNA elements in the human genome. *Nature.* 2012;489(7414):57-74.
12. Rosenbloom KR, Sloan CA, Malladi VS, Dreszer TR, Learned K, Kirkup VM, Wong MC, Maddren M, Fang R, Heitner SG, et al. ENCODE data in the UCSC Genome Browser: year 5 update. *Nucleic Acids Res.* 2013;41(Database issue):D56-63.
13. Mootha VK, Lindgren CM, Eriksson KF, Subramanian A, Sihag S, Lehar J, Puigserver P, Carlsson E, Ridderstrale M, Laurila E, et al. PGC-1alpha-responsive genes involved in oxidative phosphorylation are coordinately downregulated in human diabetes. *Nat Genet.* 2003;34(3):267-73.
14. Subramanian A, Tamayo P, Mootha VK, Mukherjee S, Ebert BL, Gillette MA, Paulovich A, Pomeroy SL, Golub TR, Lander ES, et al. Gene set enrichment analysis: a knowledge-based approach for interpreting genome-wide expression profiles. *Proc Natl Acad Sci U S A.* 2005;102(43):15545-50.
15. Reich M, Liefeld T, Gould J, Lerner J, Tamayo P, and Mesirov JP. GenePattern 2.0. *Nat Genet.* 2006;38(5):500-1.
16. Gautier L, Cope L, Bolstad BM, and Irizarry RA. affy--analysis of Affymetrix GeneChip data at the probe level. *Bioinformatics.* 2004;20(3):307-15.
17. Venables WN, and Ripley BD. *Modern Applied Statistics.* Springer; 2002.

18. Adler D. Violin Plot. R package version 2.0. <http://wsopuppenkiste.wiso.uni-goettingen.de/~dadler>; 2005.
19. Warnes GR, Bolker B, Bonebakker L, Gentleman R, Liaw WHA, Lumley T, Maechler M, Magnusson A, Moeller S, Schwartz M, et al.; 2014.
20. Ross-Innes CS, Stark R, Teschendorff AE, Holmes KA, Ali HR, Dunning MJ, Brown GD, Gojis O, Ellis IO, Green AR, et al. Differential oestrogen receptor binding is associated with clinical outcome in breast cancer. *Nature*. 2012;481(7381):389-93.
21. Stark R, and Brown G. Diffbind: differential binding analysis of ChIP-seq peak data. Bioconductor 2011;  
<http://bioconductor.org/packages/release/bioc/vignettes/DiffBind/inst/doc/DiffBind.pdf>.
22. McLean CY, Bristor D, Hiller M, Clarke SL, Schaar BT, Lowe CB, Wenger AM, and Bejerano G. GREAT improves functional interpretation of cis-regulatory regions. *Nat Biotechnol*. 2010;28(5):495-501.

11/10/2011

FL1542P37  
FL 178.5P36  
TM024P33  
TM052P39  
TM089P31  
TM092P31  
TM0102P32  
FL1542P32  
CMK

1°  $\alpha$ -hGATA1 1/1000  
2°  $\alpha$ -rabbit 1/10,000

Fig

## SUPPLEMENTAL UNCUT GELS

Lane

1 = WT

2 = T21

3 = 2.4

4 = 5.2

5 = 8.9

6 = 9.8

7 = 10.2

8 not shown

9 not shown

11/12/11

— — — — —

$\alpha$ -actin

Fig

$\alpha$ HA (Y-III)  
 148 -  
 98 -  
 64 -  
 50 -  
 36 -

GIME  
 GIME+  
 GATAI  
 GIME+  
 GATAIS

02

—

—

$\alpha$ Bractin  
 98 -  
 64 -  
 50 -  
 36 -

GIME  
 GIME+  
 GATAI  
 GIME+  
 GATAIS

02

—

—

—
